# Supplementary material
Source: ML conference proceedings conference paper supplement (https://openreview.net/forum?id=1R_PRbQK2eu)

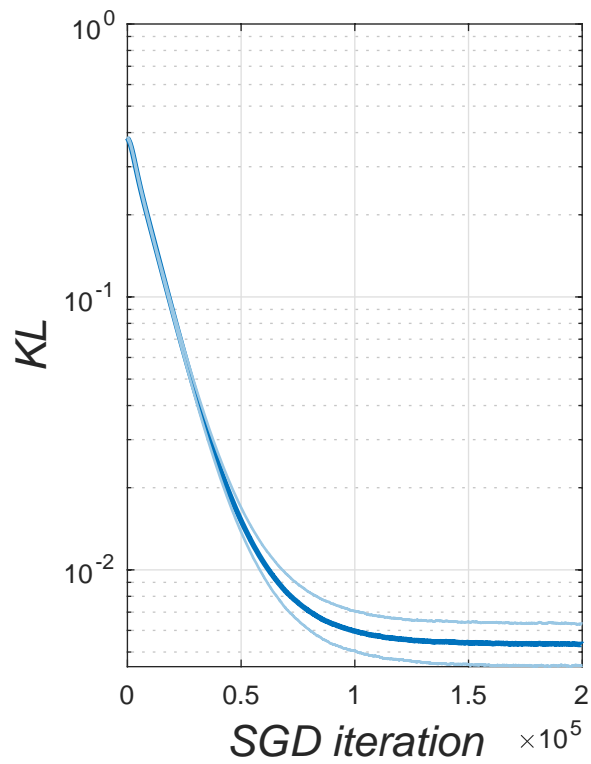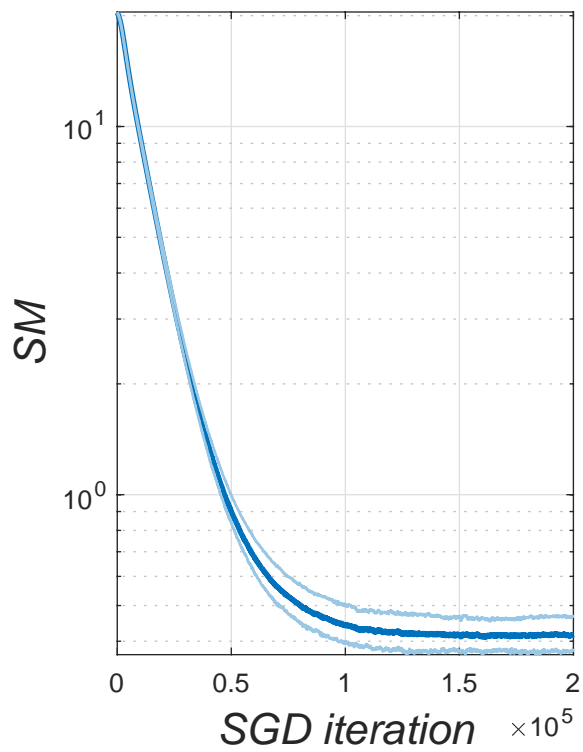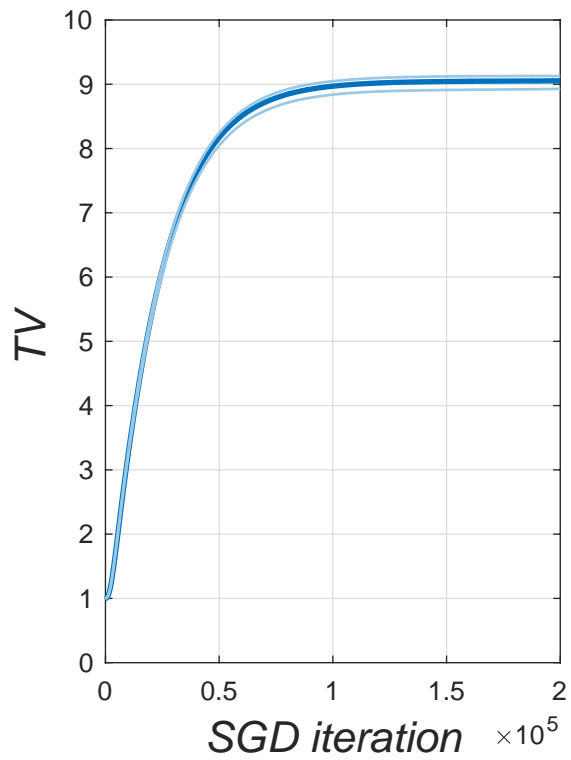

Supplement: supplementary_material [file attachment]

**Teacher density**

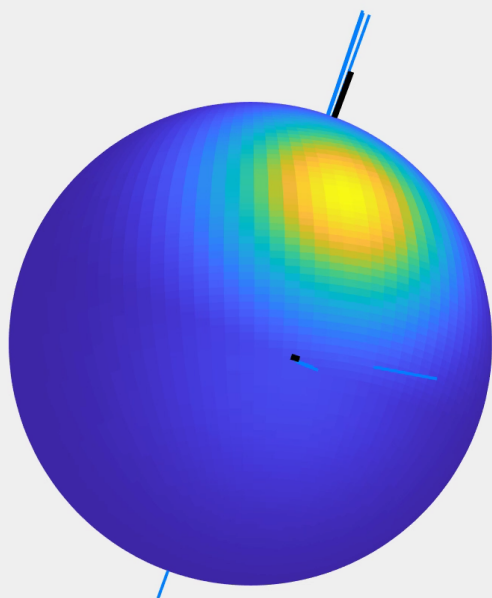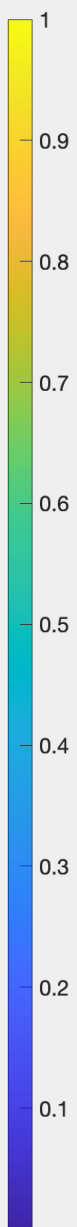

**Student density at iteration 40000**

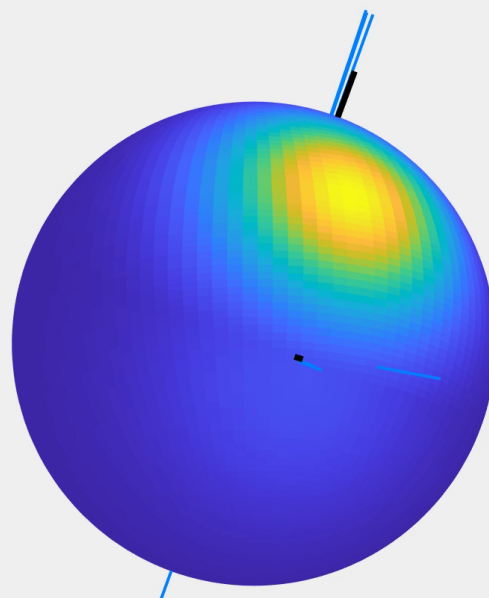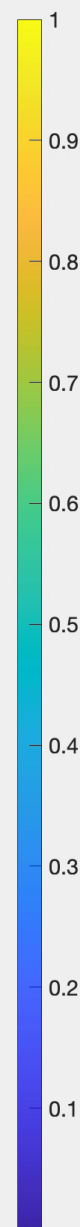

Supplement: supplementary_material [file attachment]

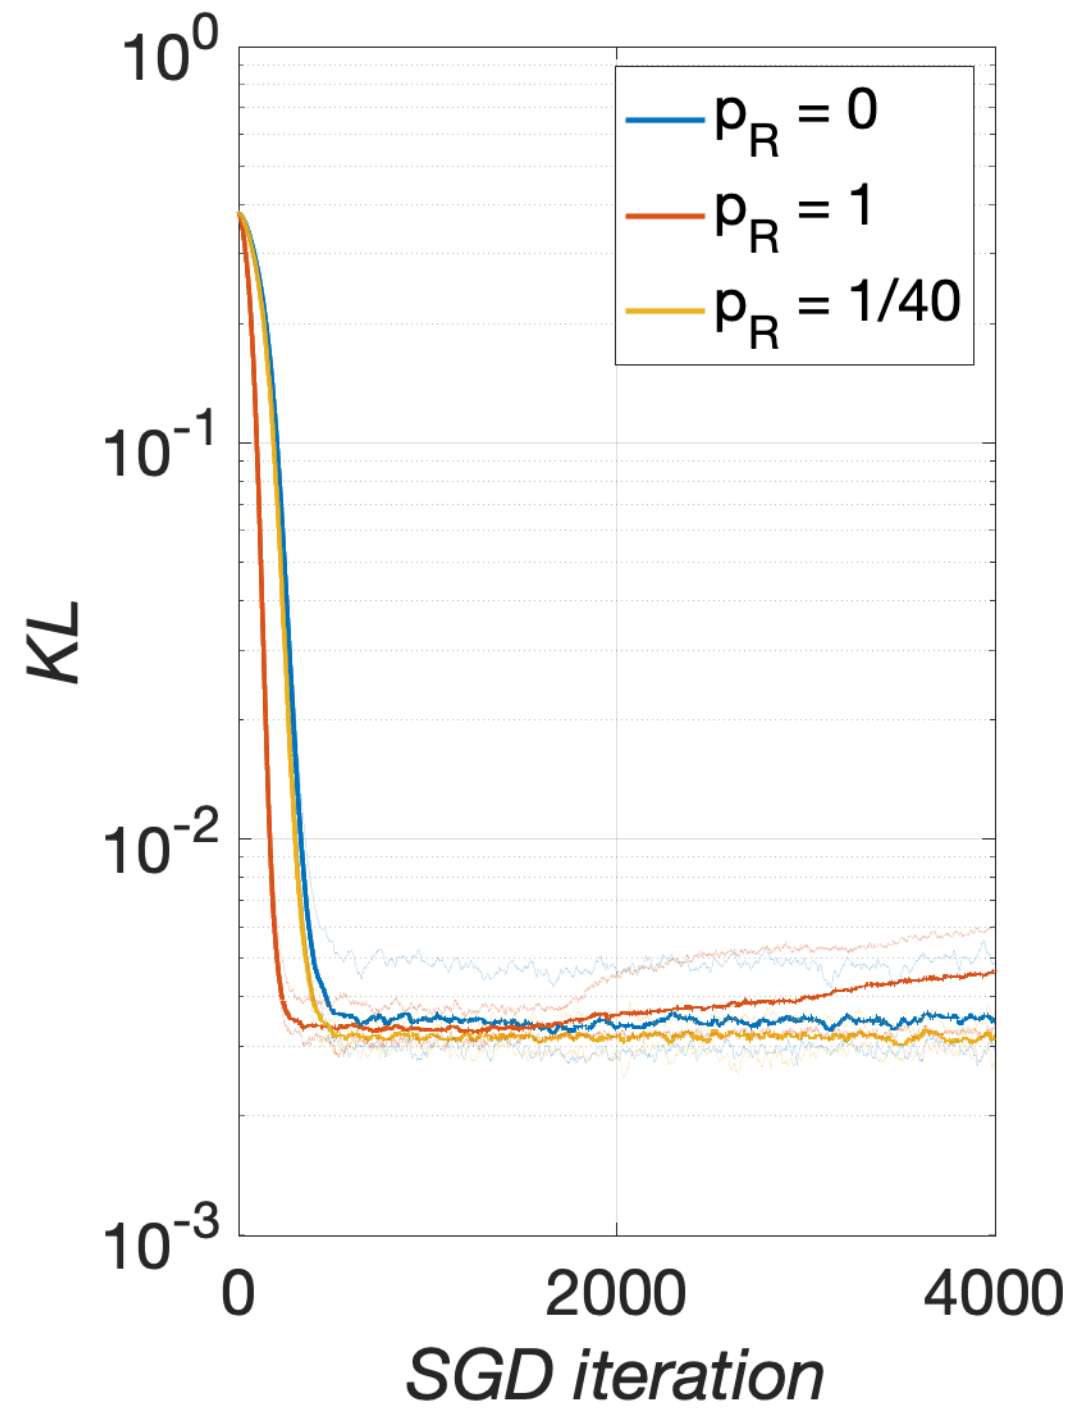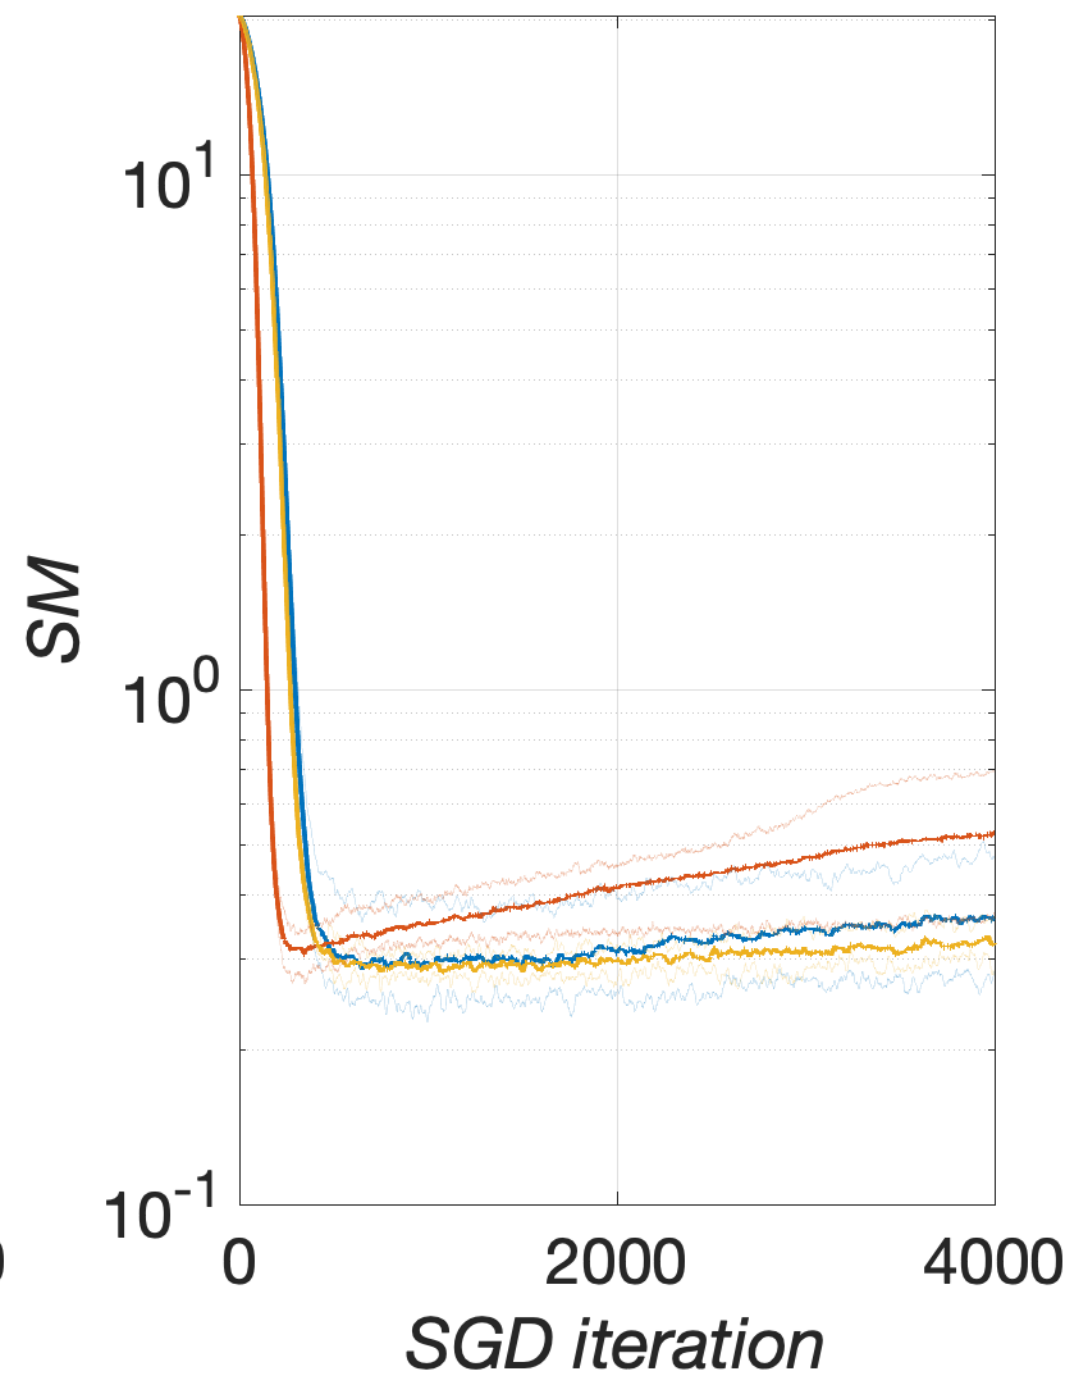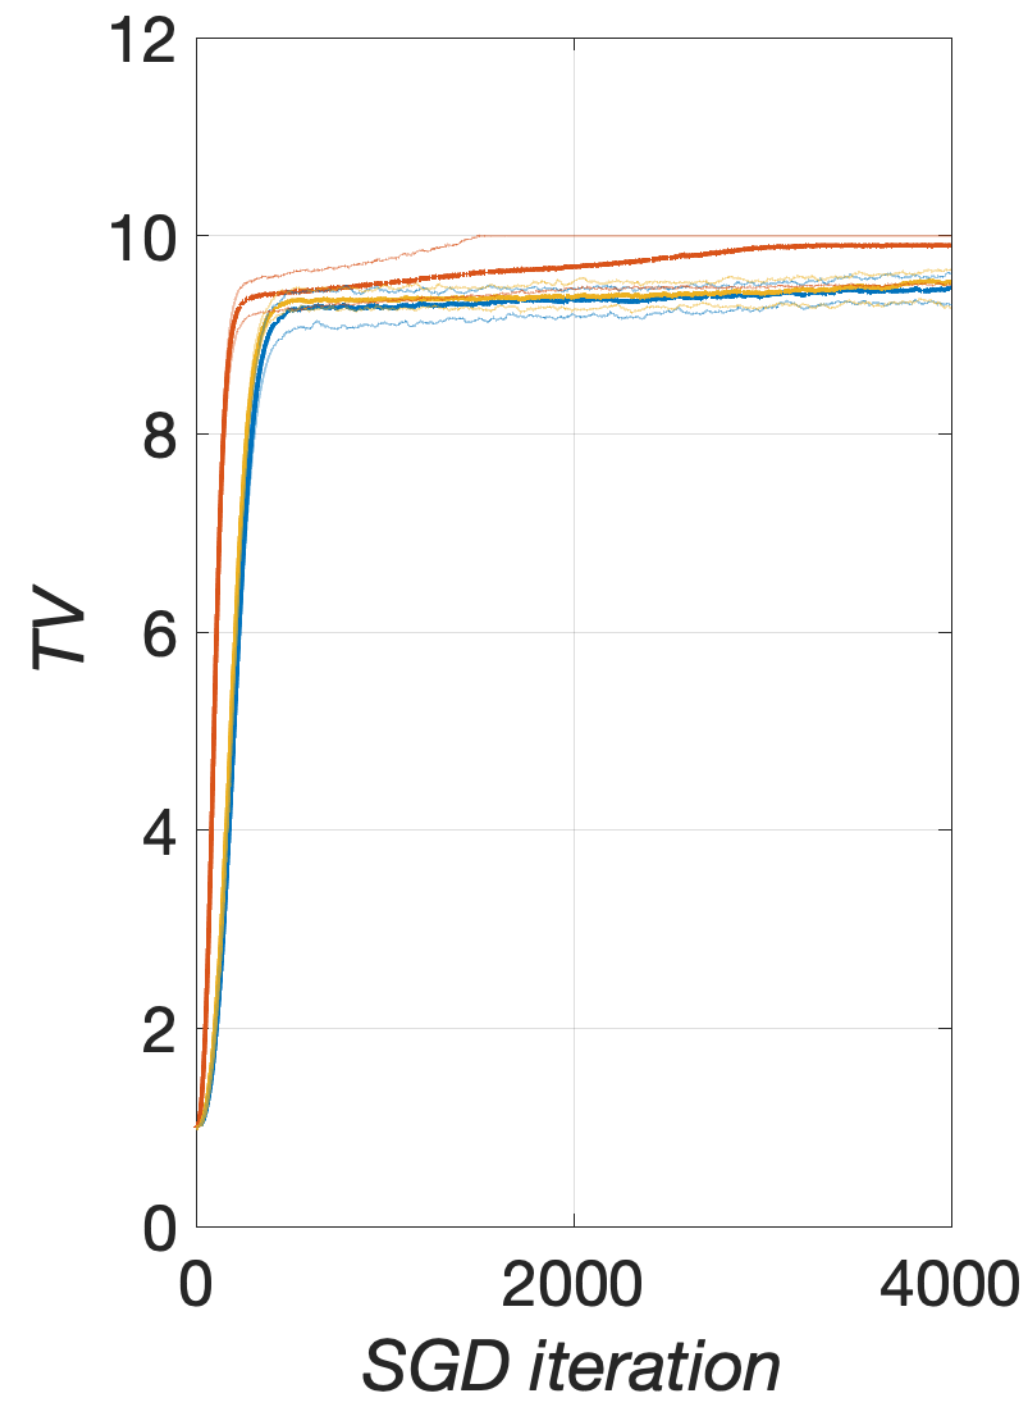

Supplement: supplementary_material [file attachment]

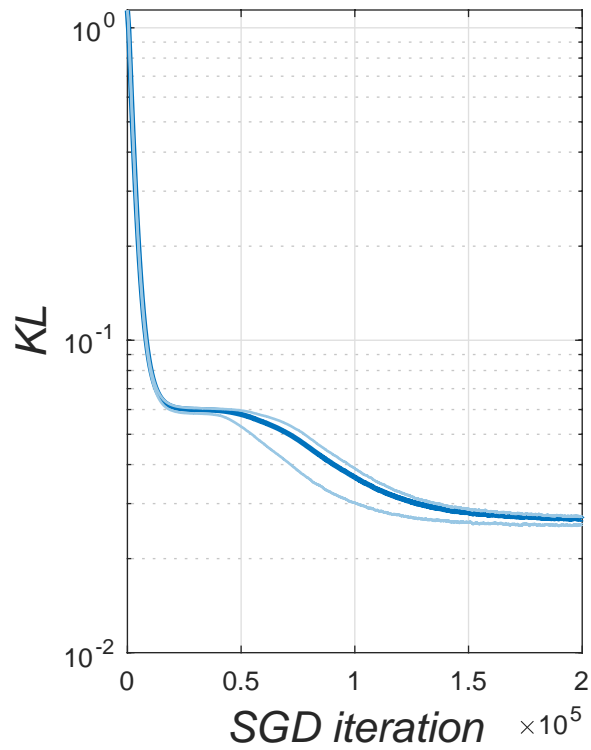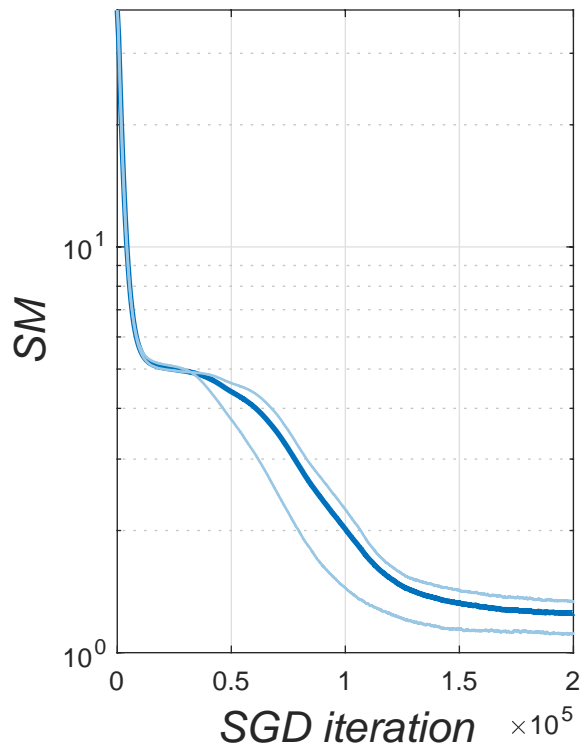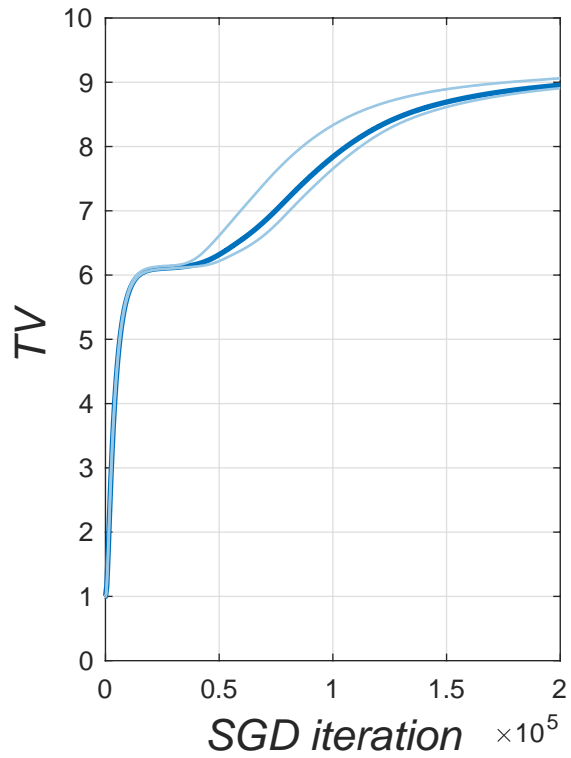

Supplement: supplementary_material [file attachment]

**Teacher density**

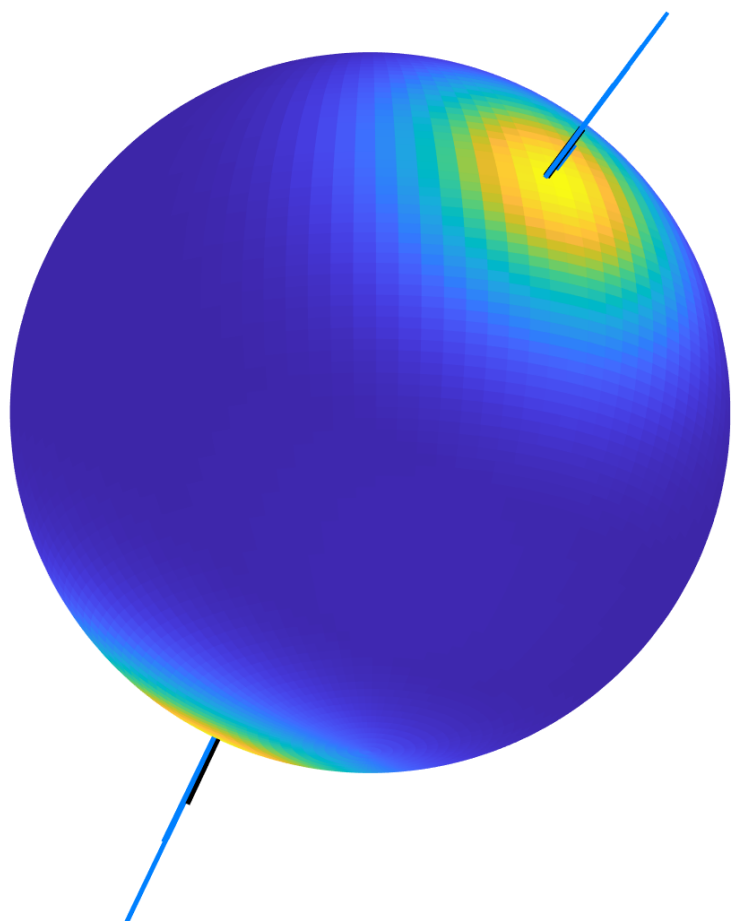

**Student density**

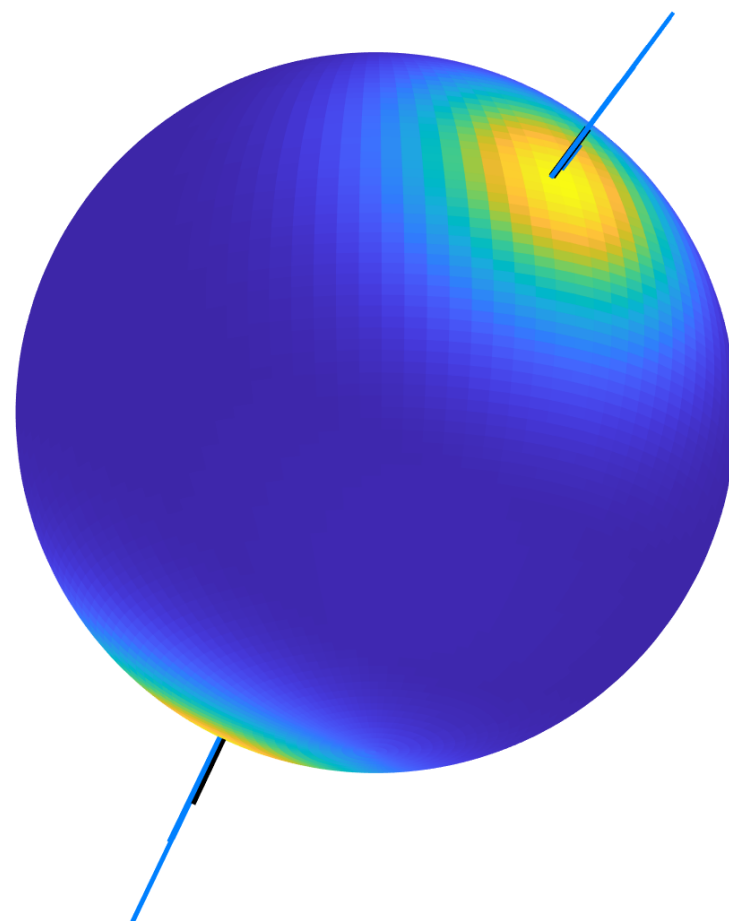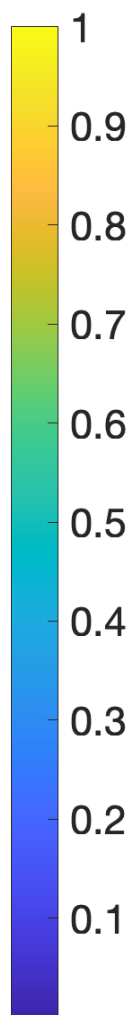

Supplement: supplementary_material [file attachment]

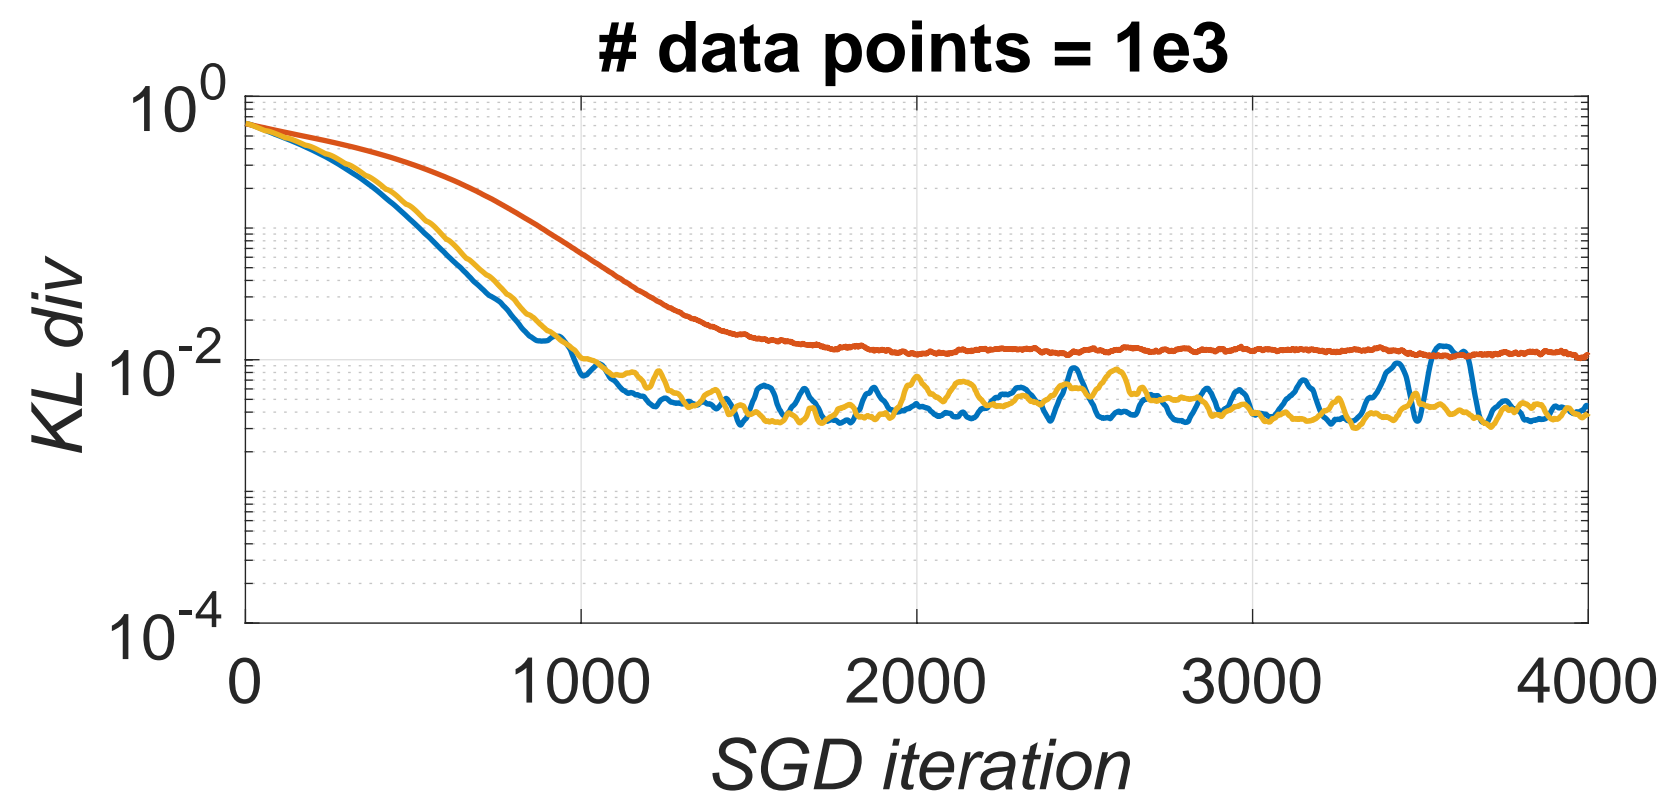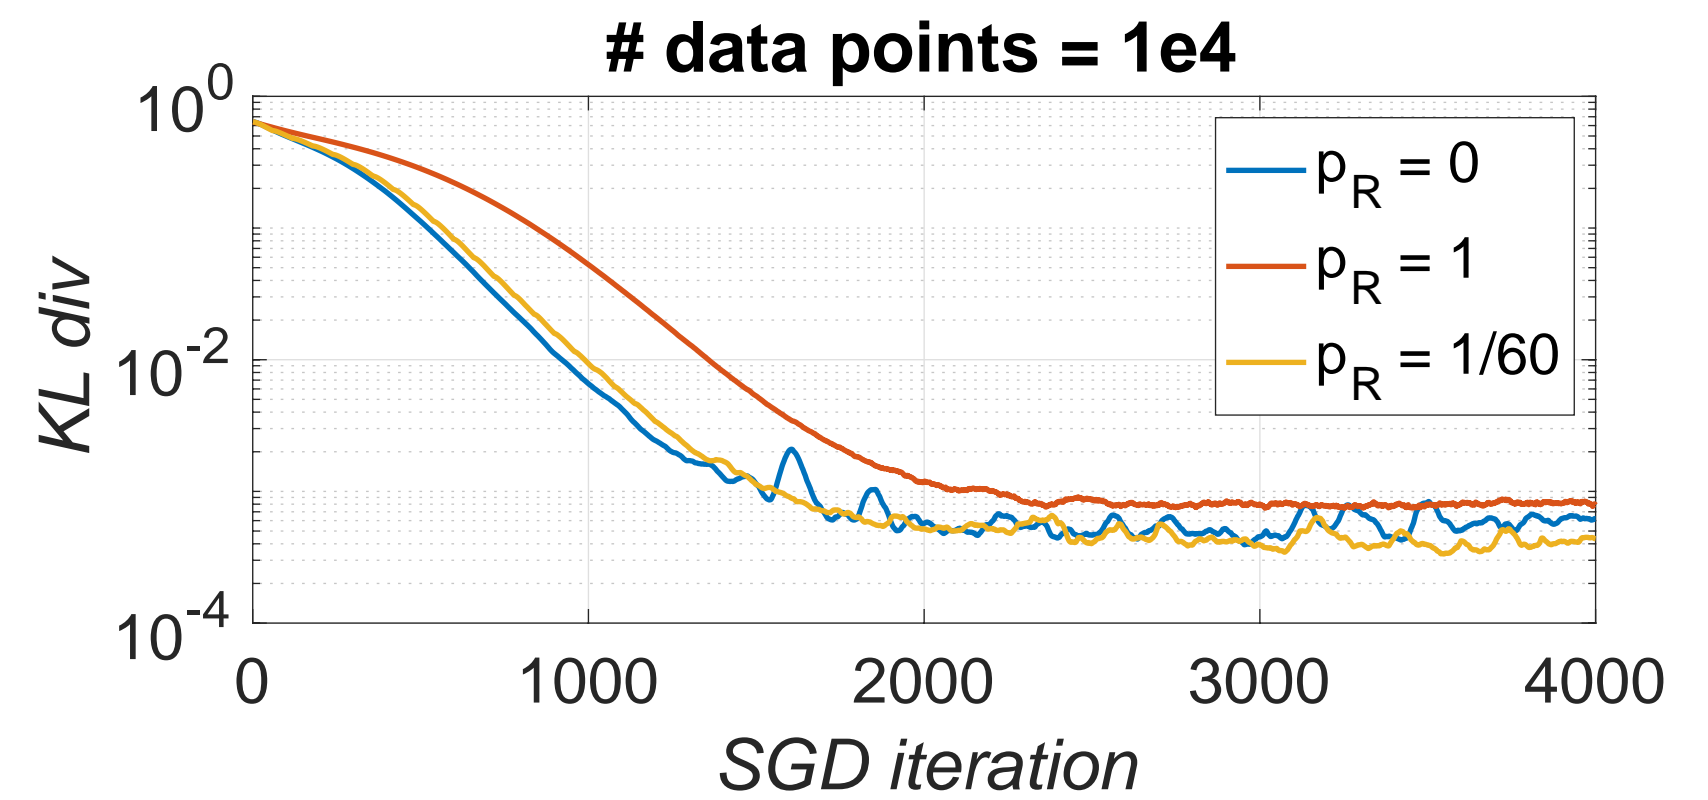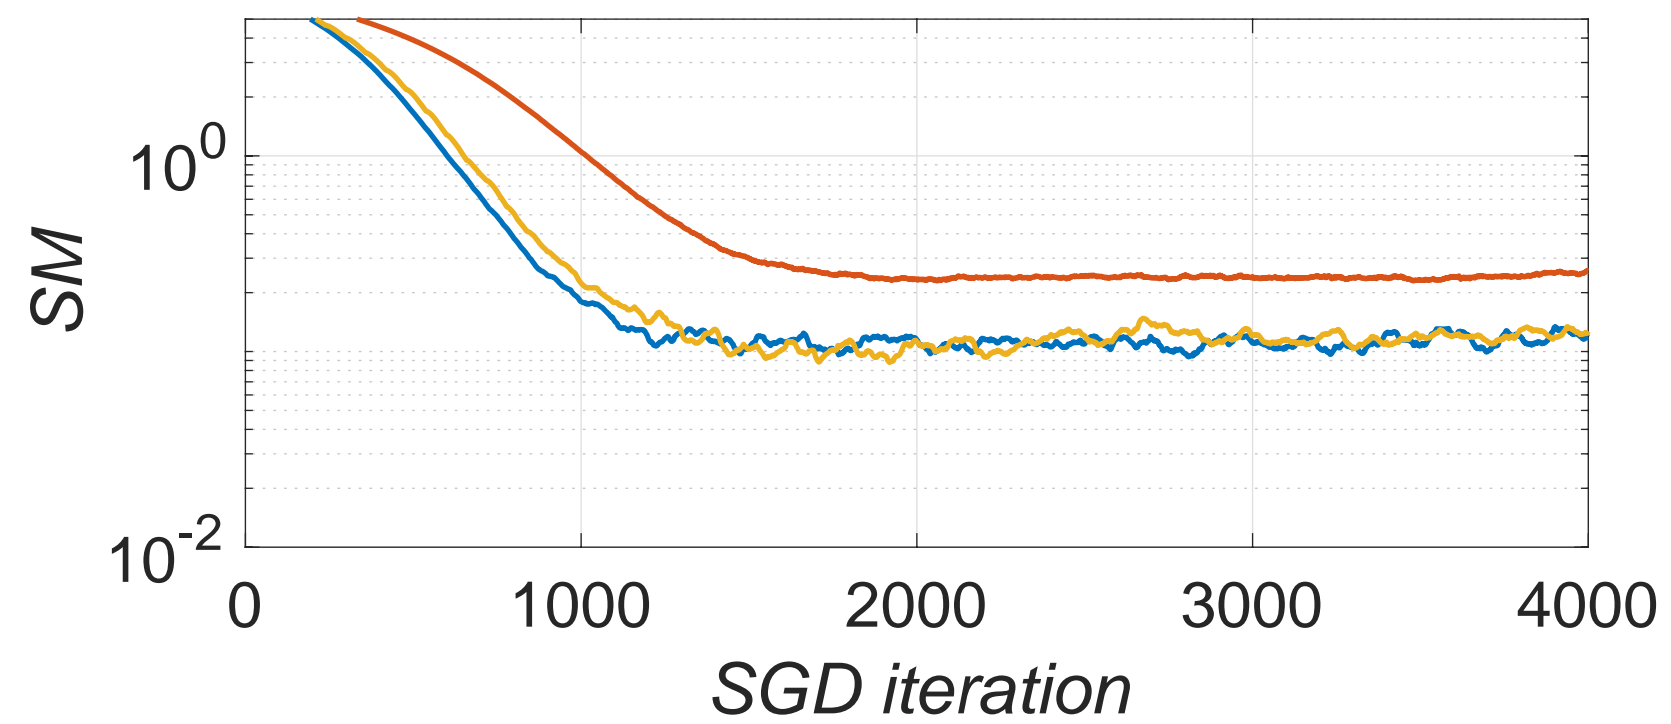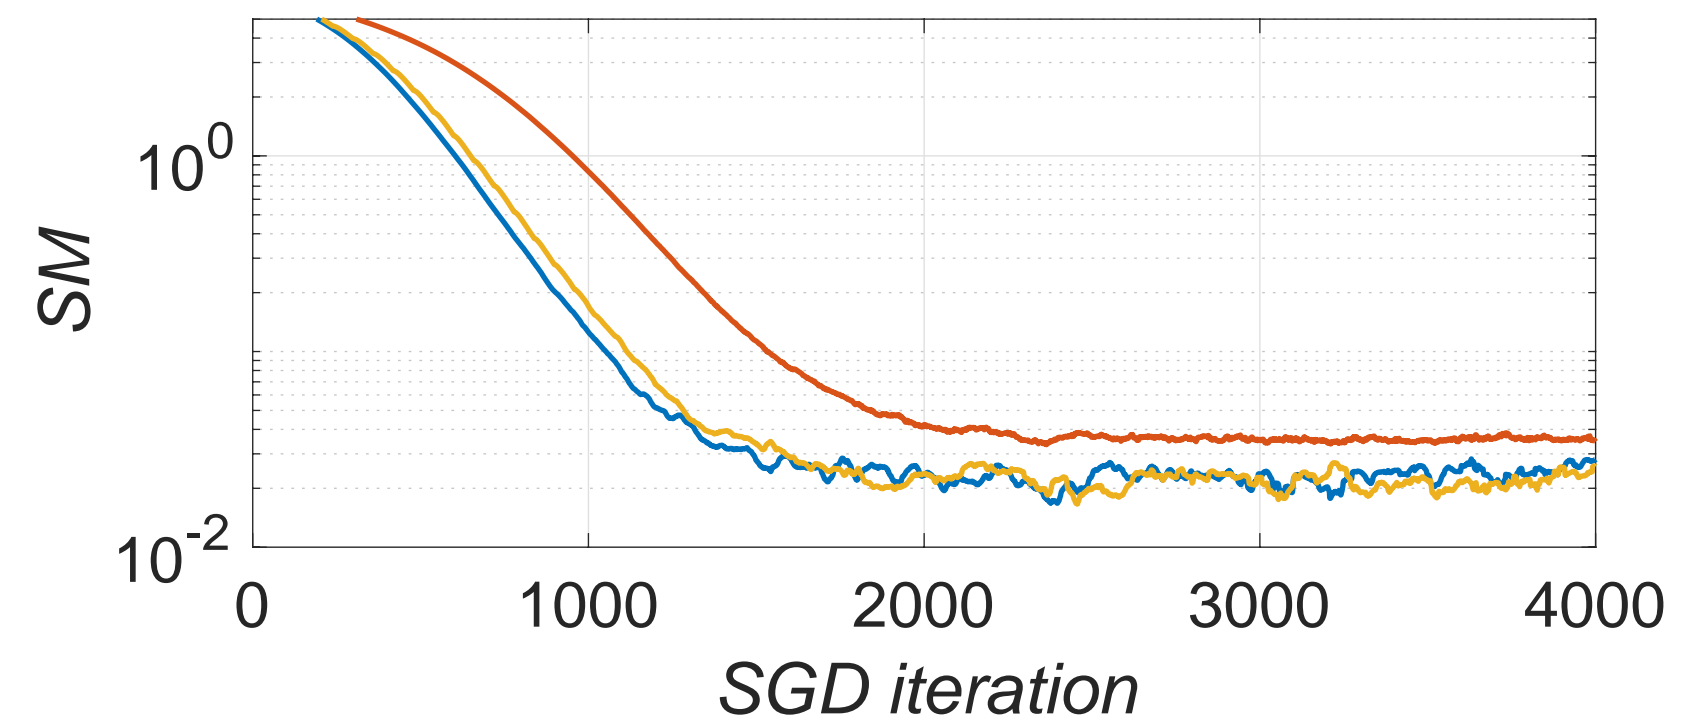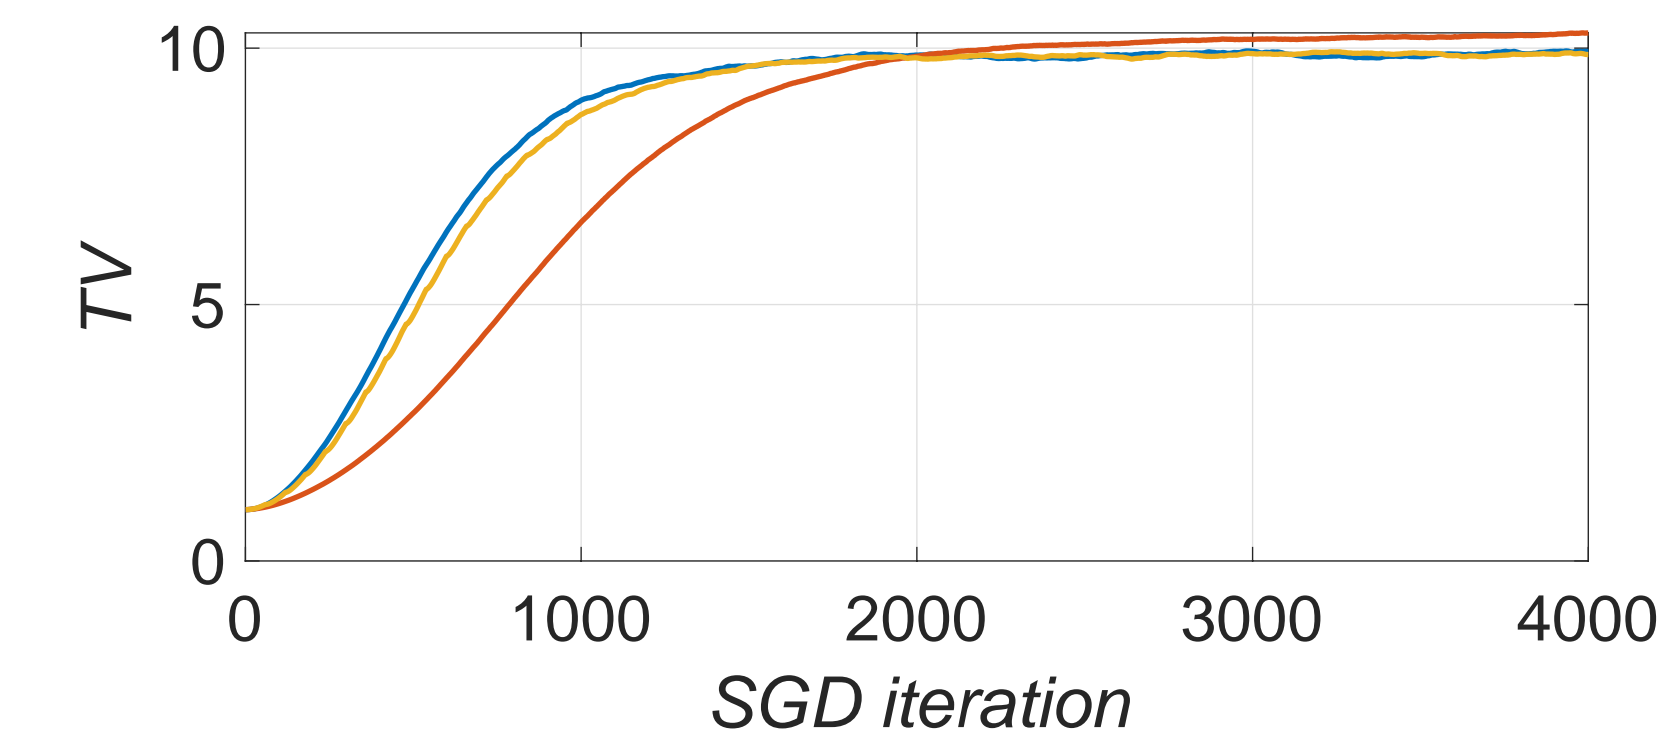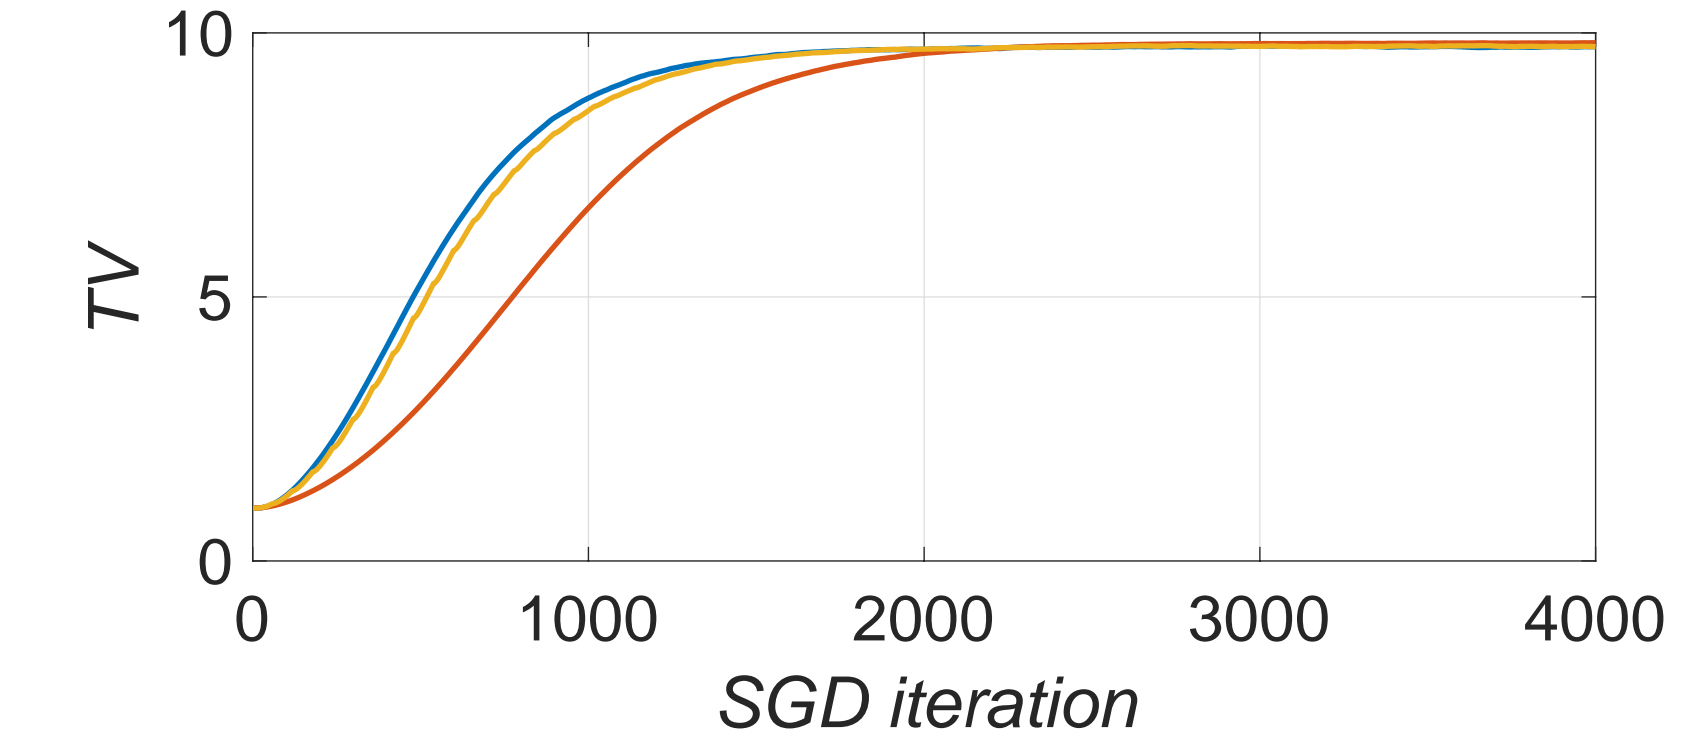

Supplement: supplementary_material [file attachment]

**2.87 rad**

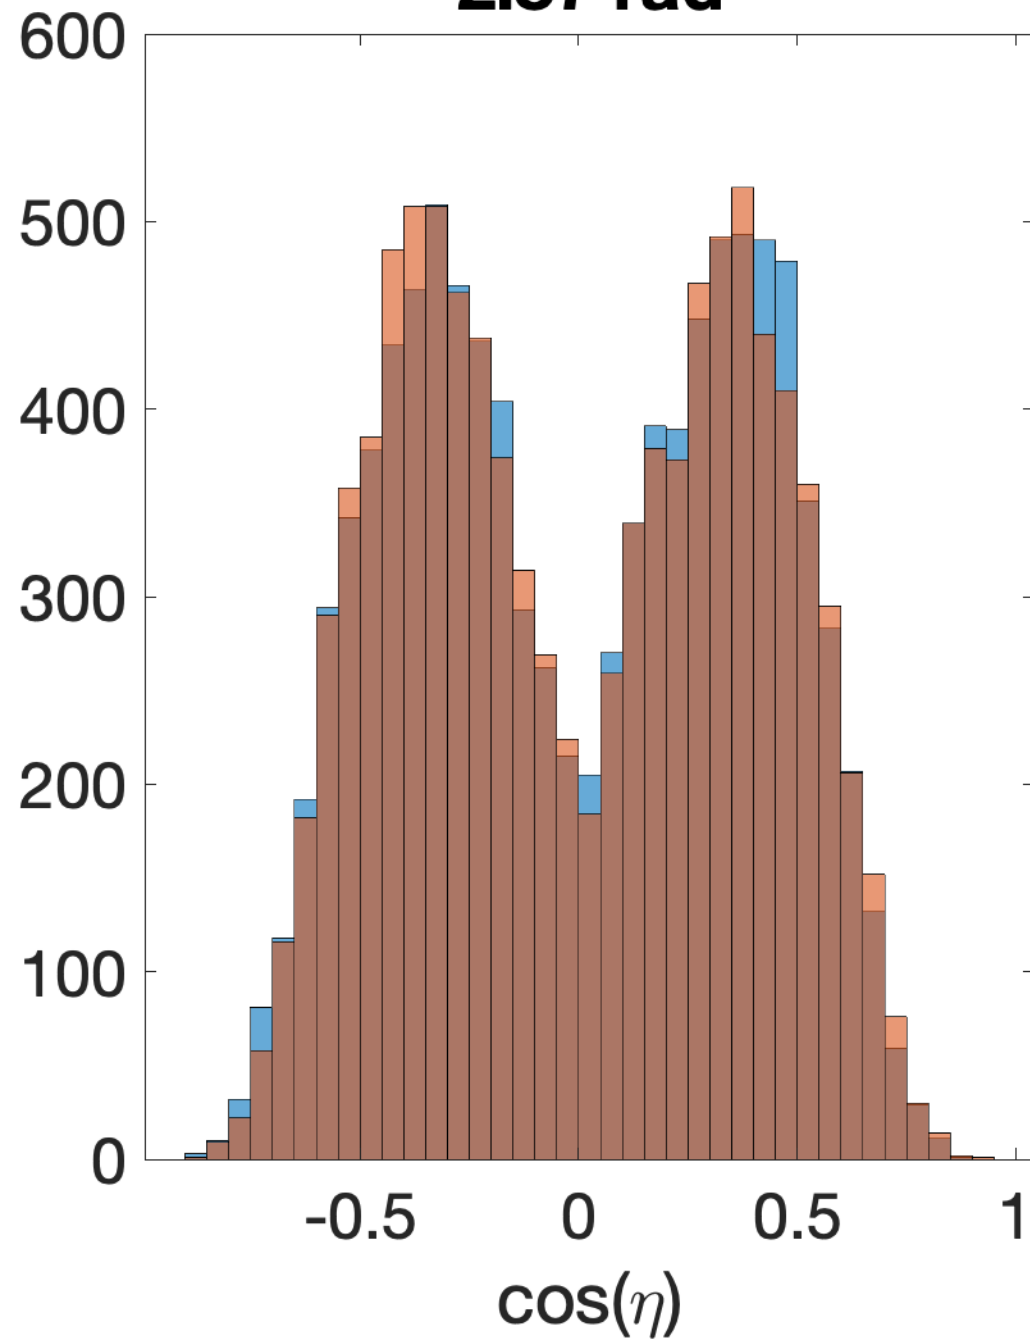

**1.37 rad**

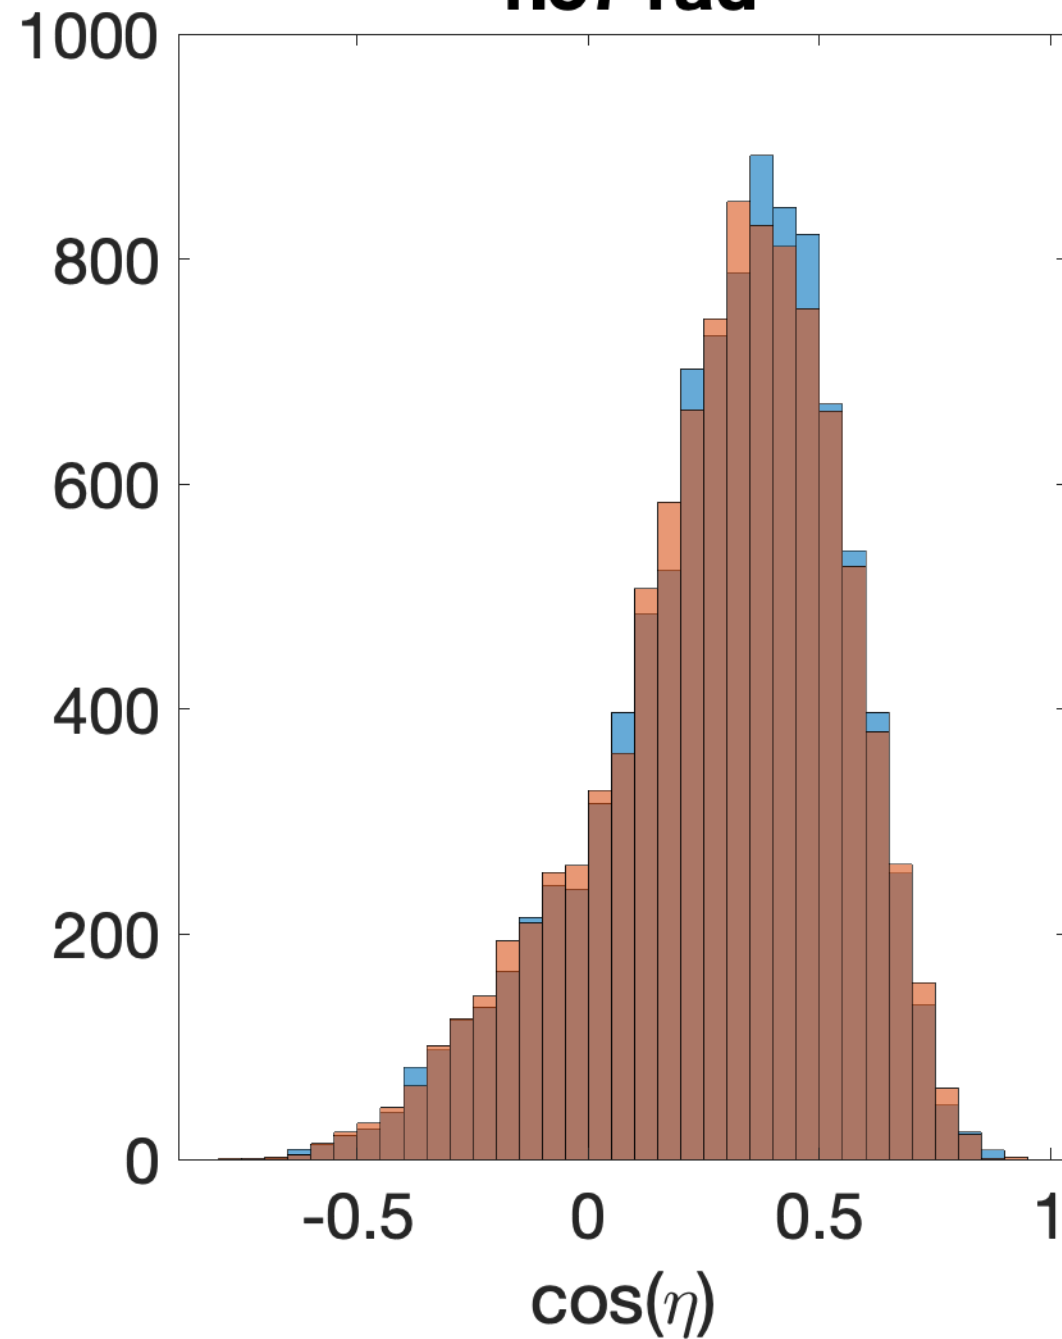

Supplement: supplementary_material [file attachment]

**Teacher density**

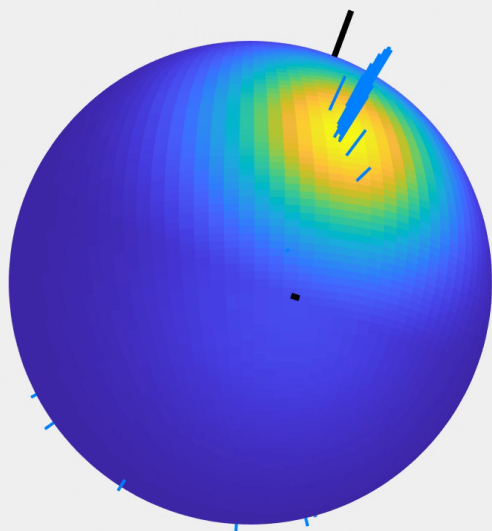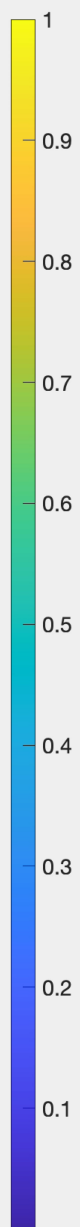

**Student density at iteration 400**

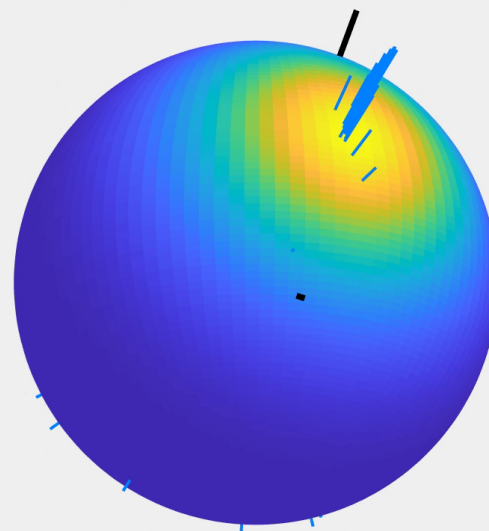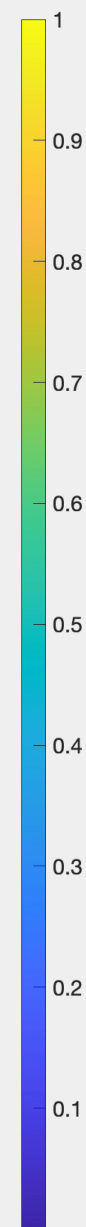

Supplement: supplementary_material [file attachment]

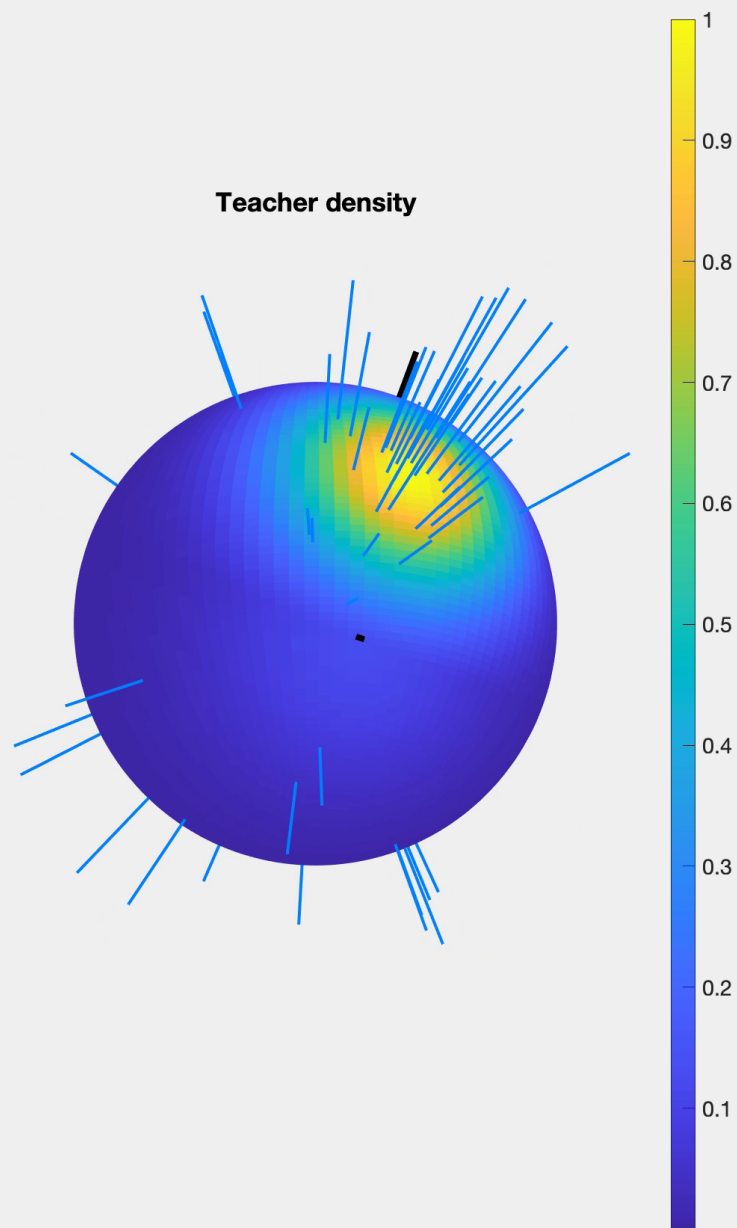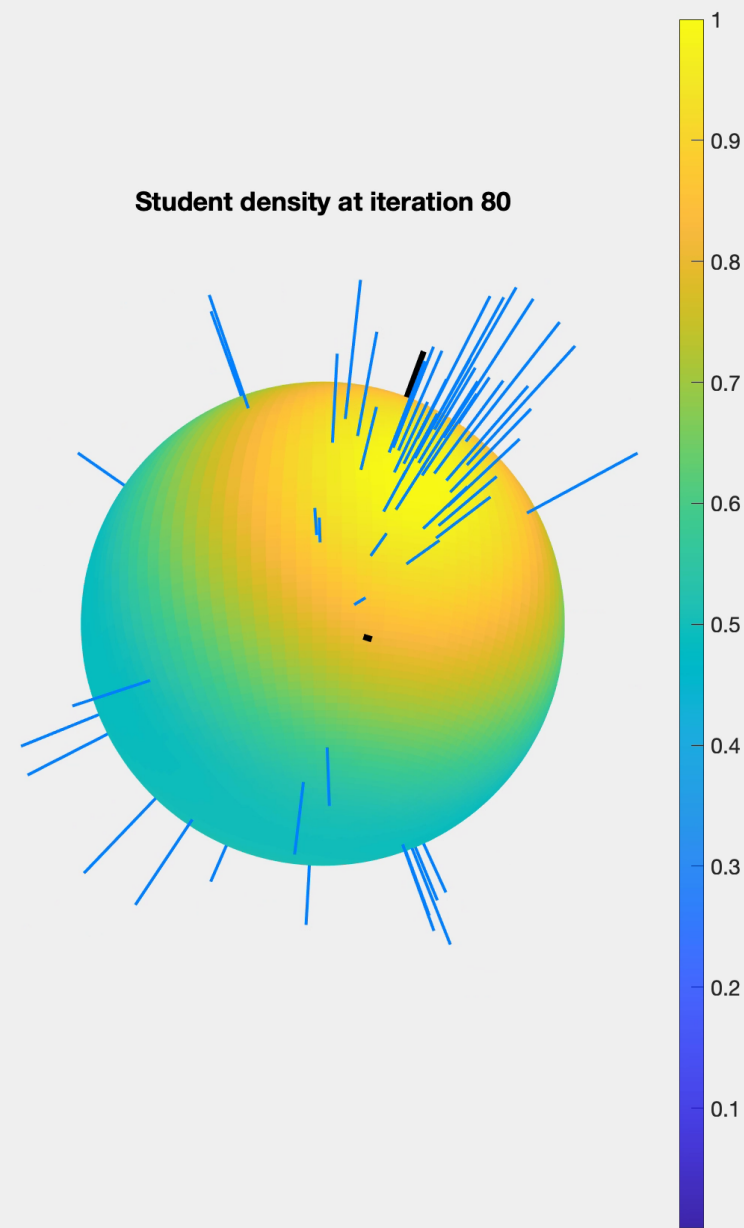

Supplement: supplementary_material [file attachment]

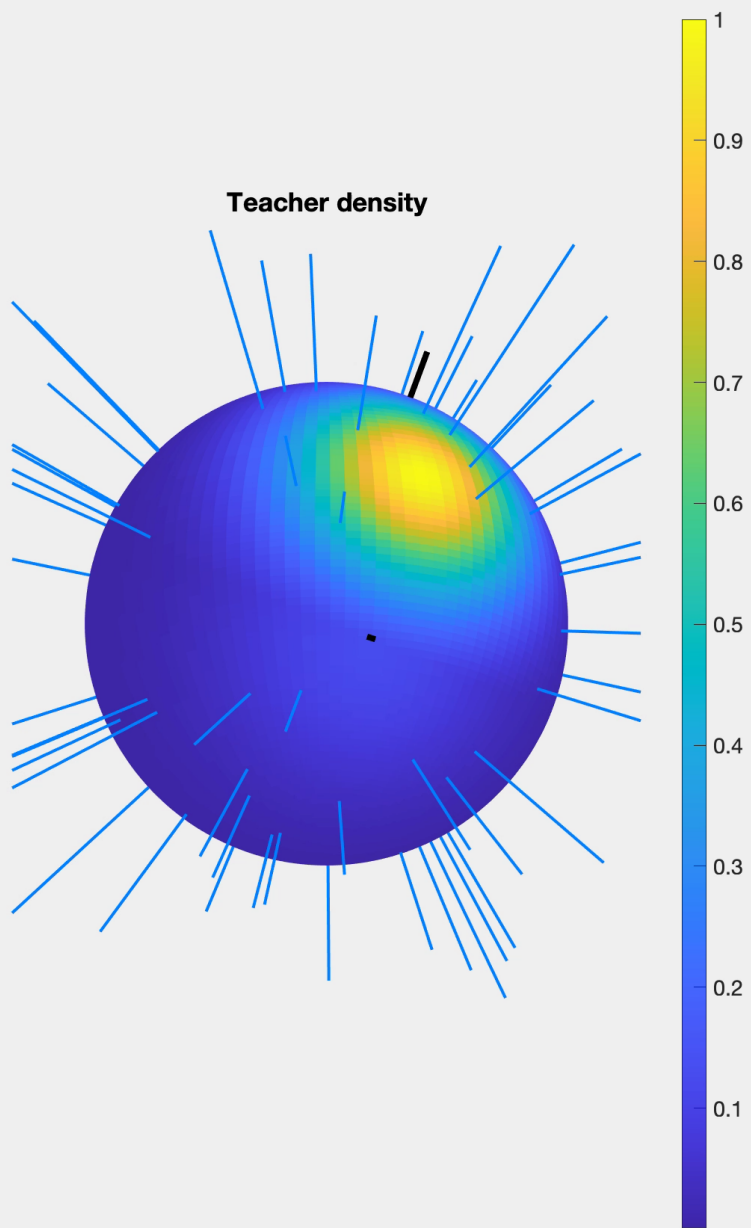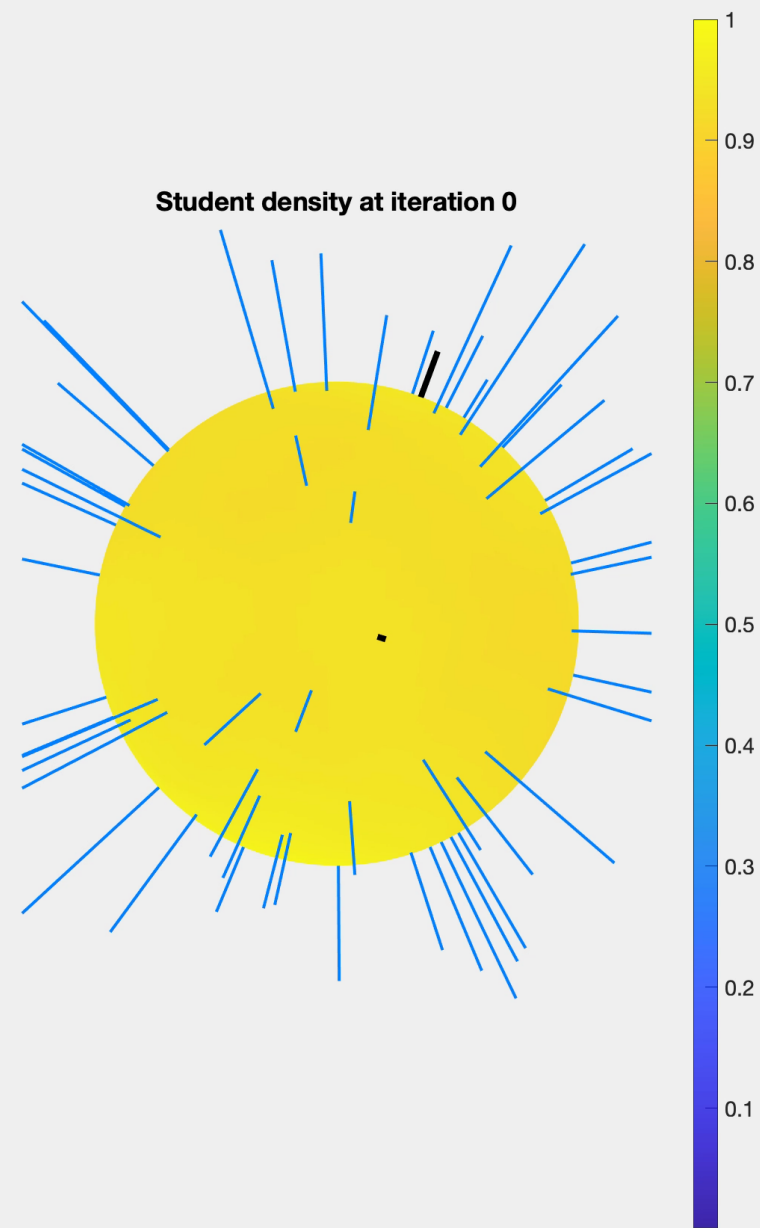

Supplement: supplementary_material [file attachment]

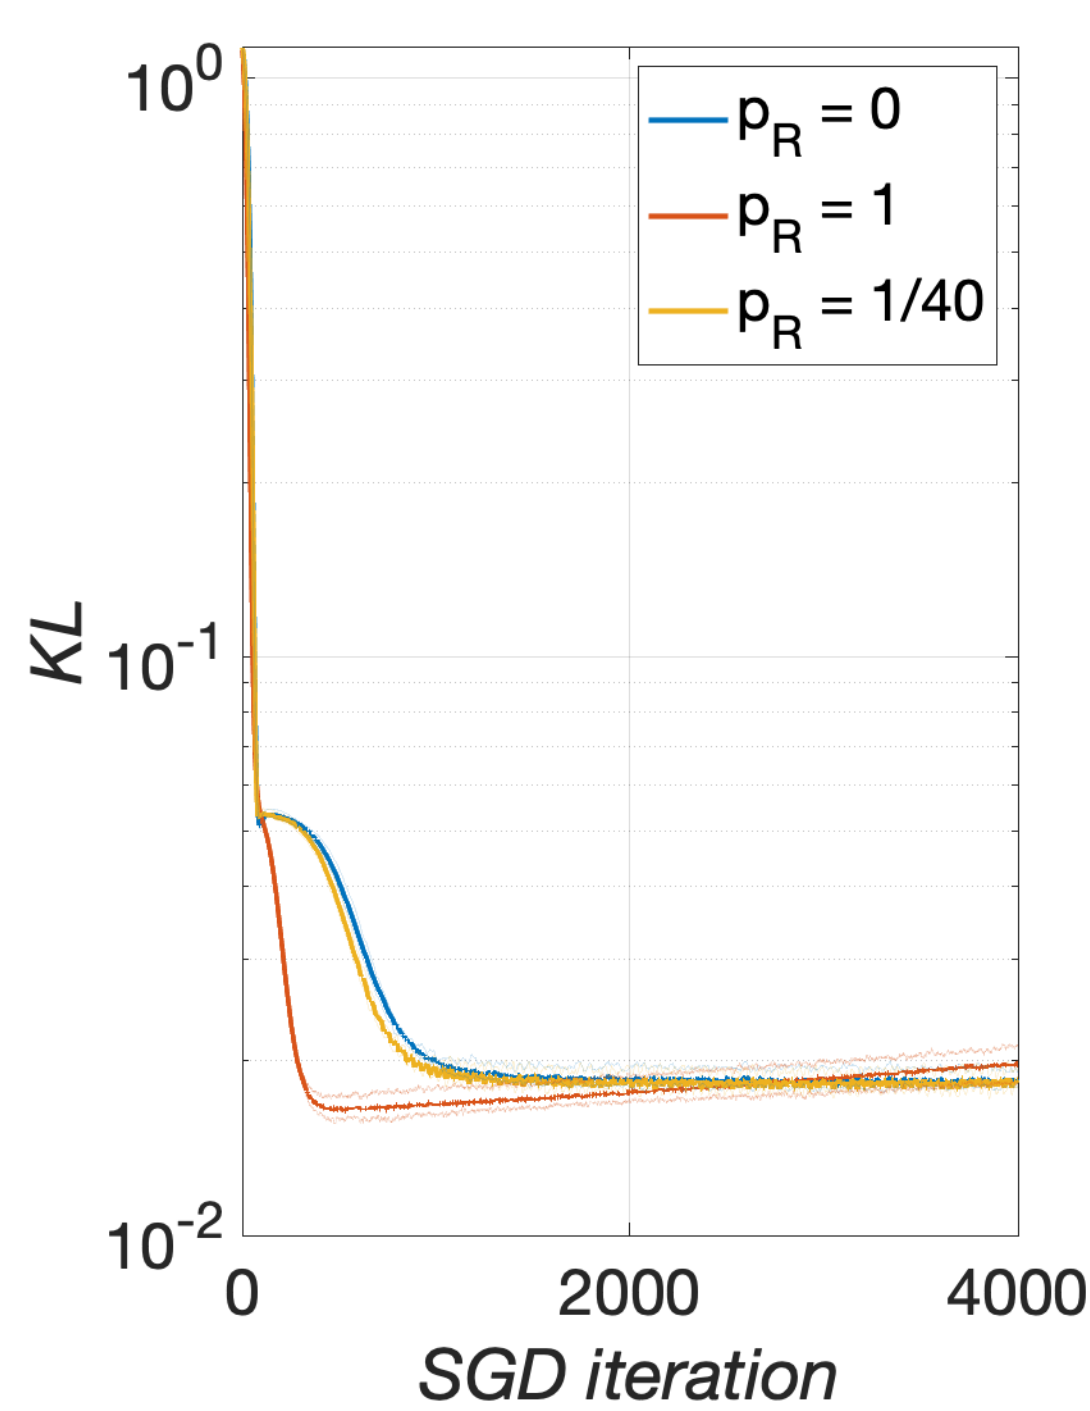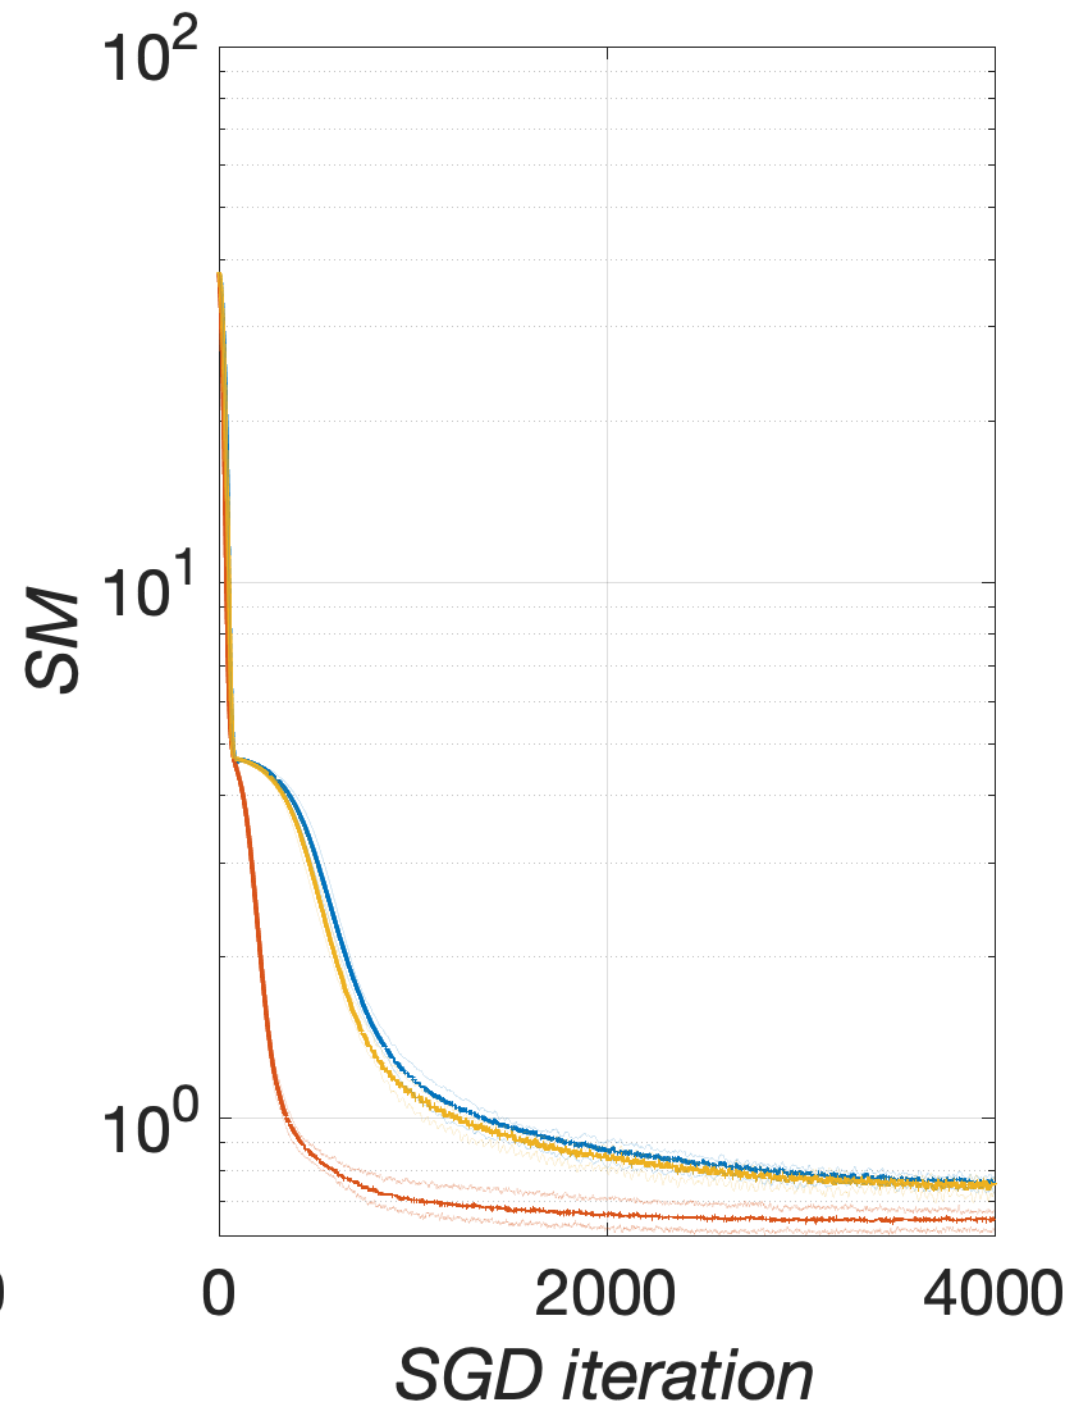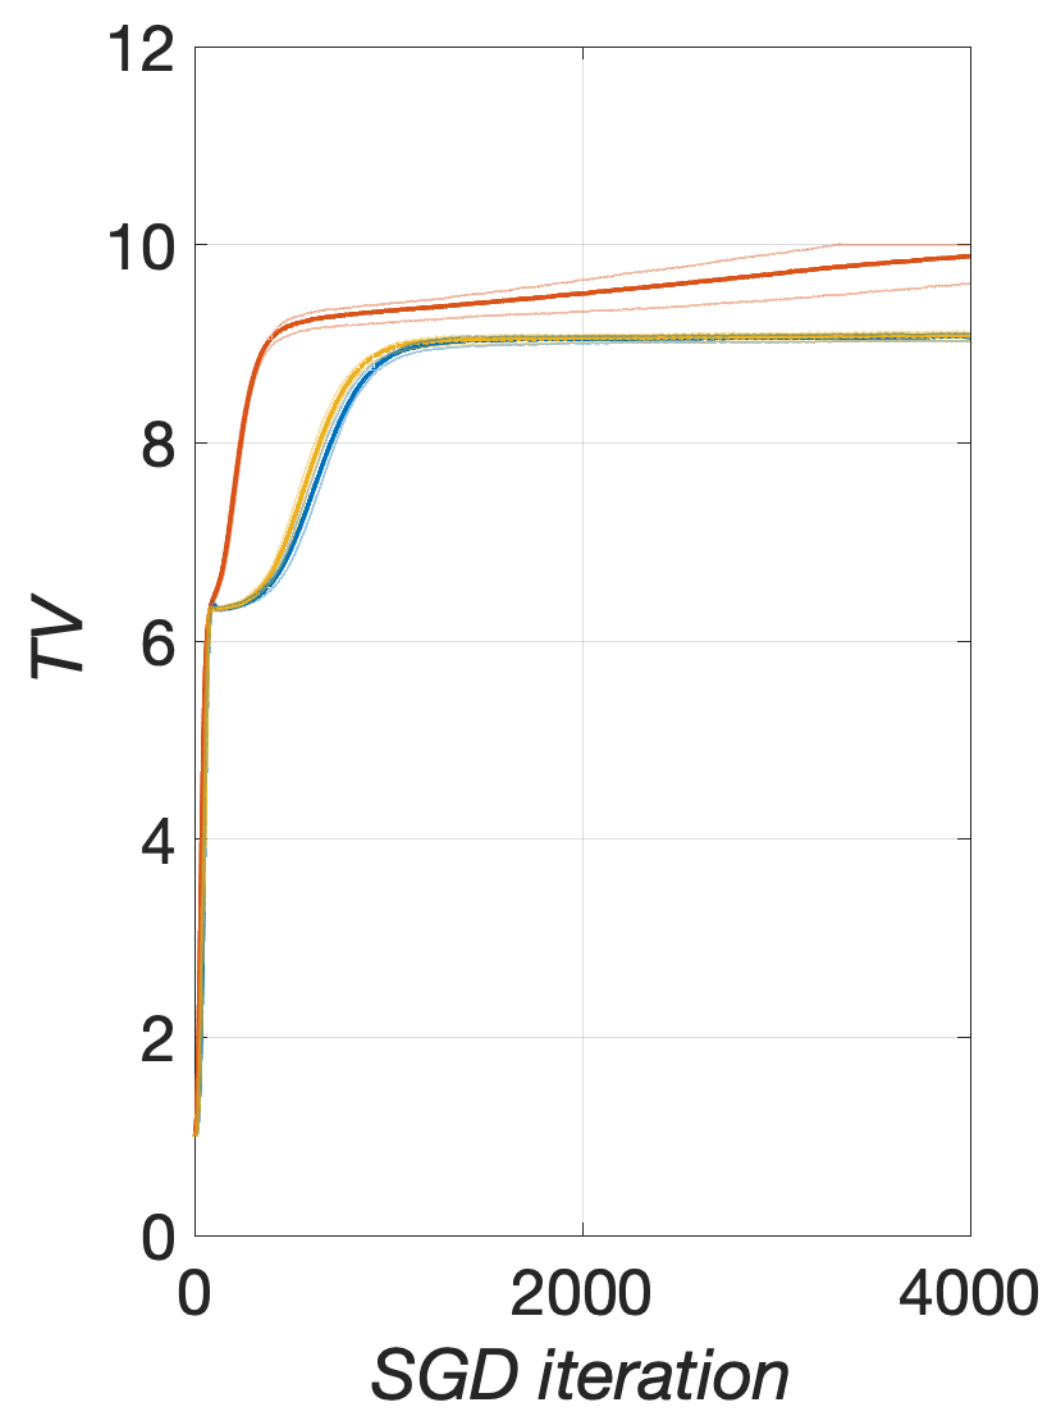

Supplement: supplementary_material [file attachment]

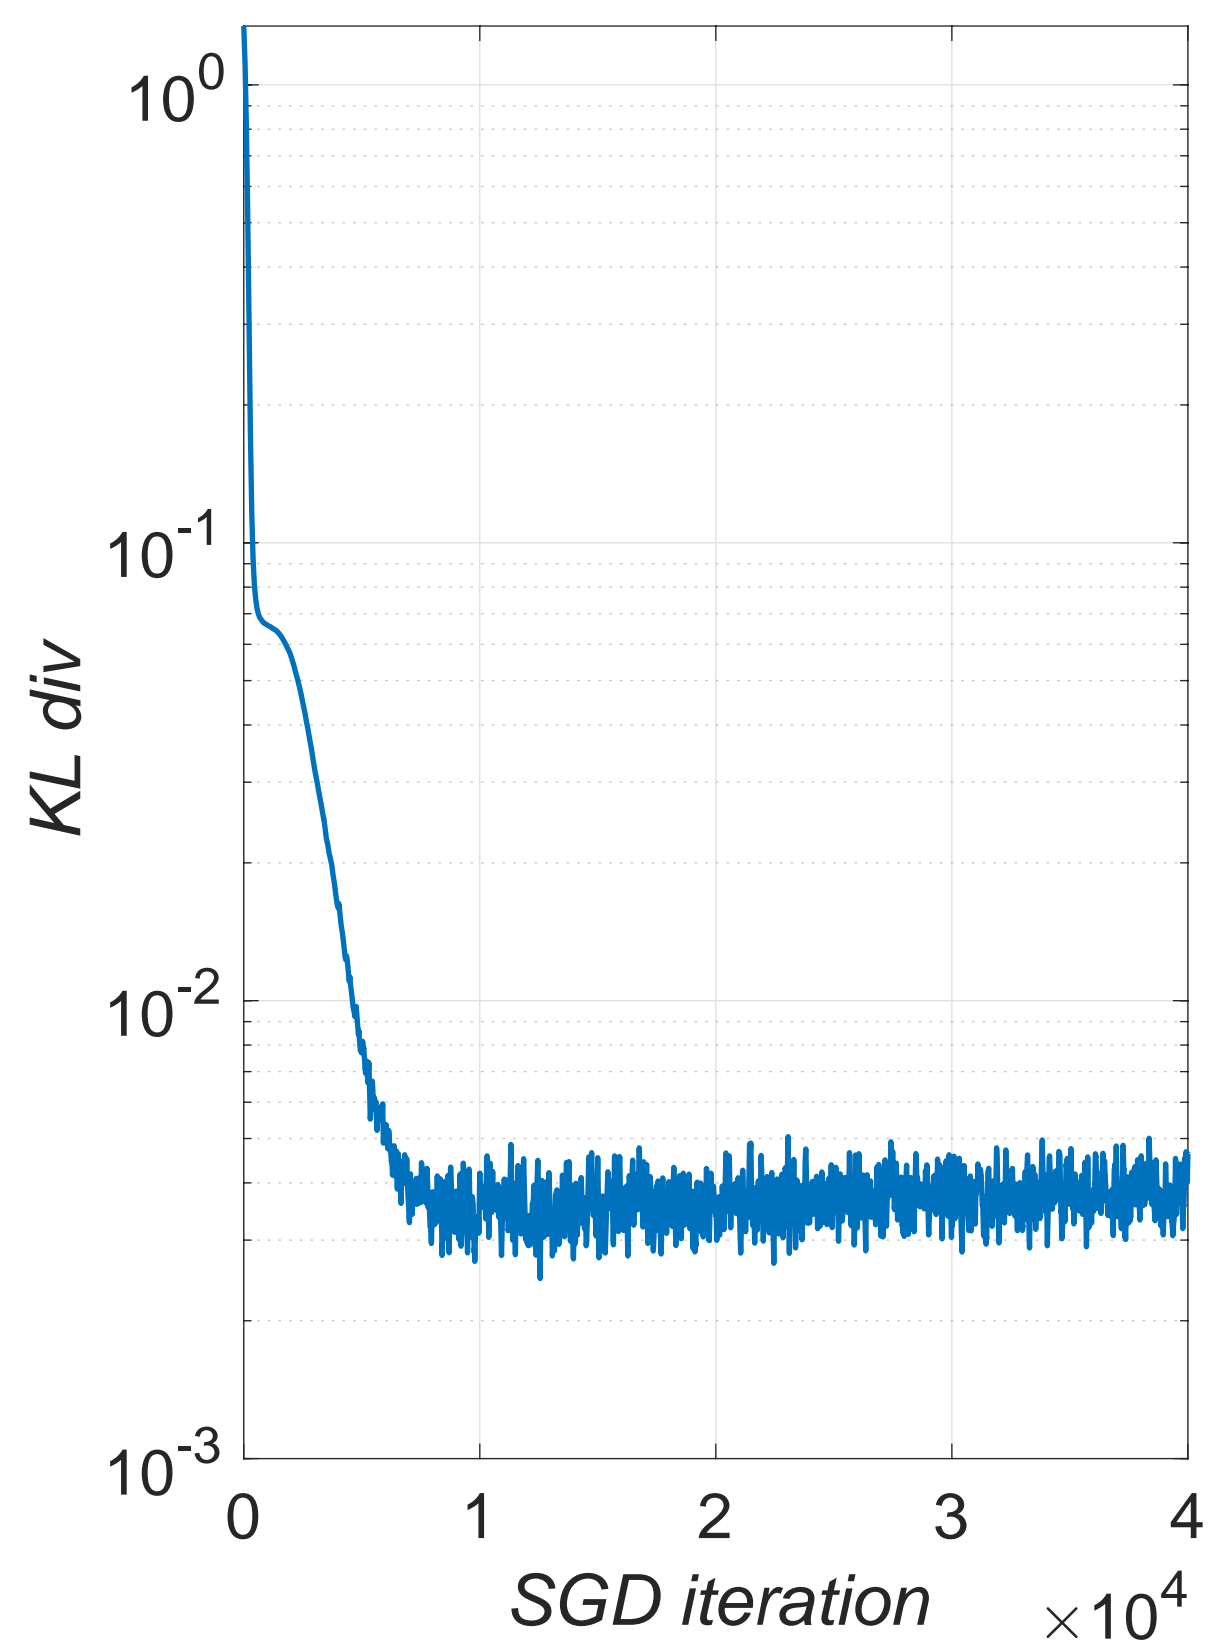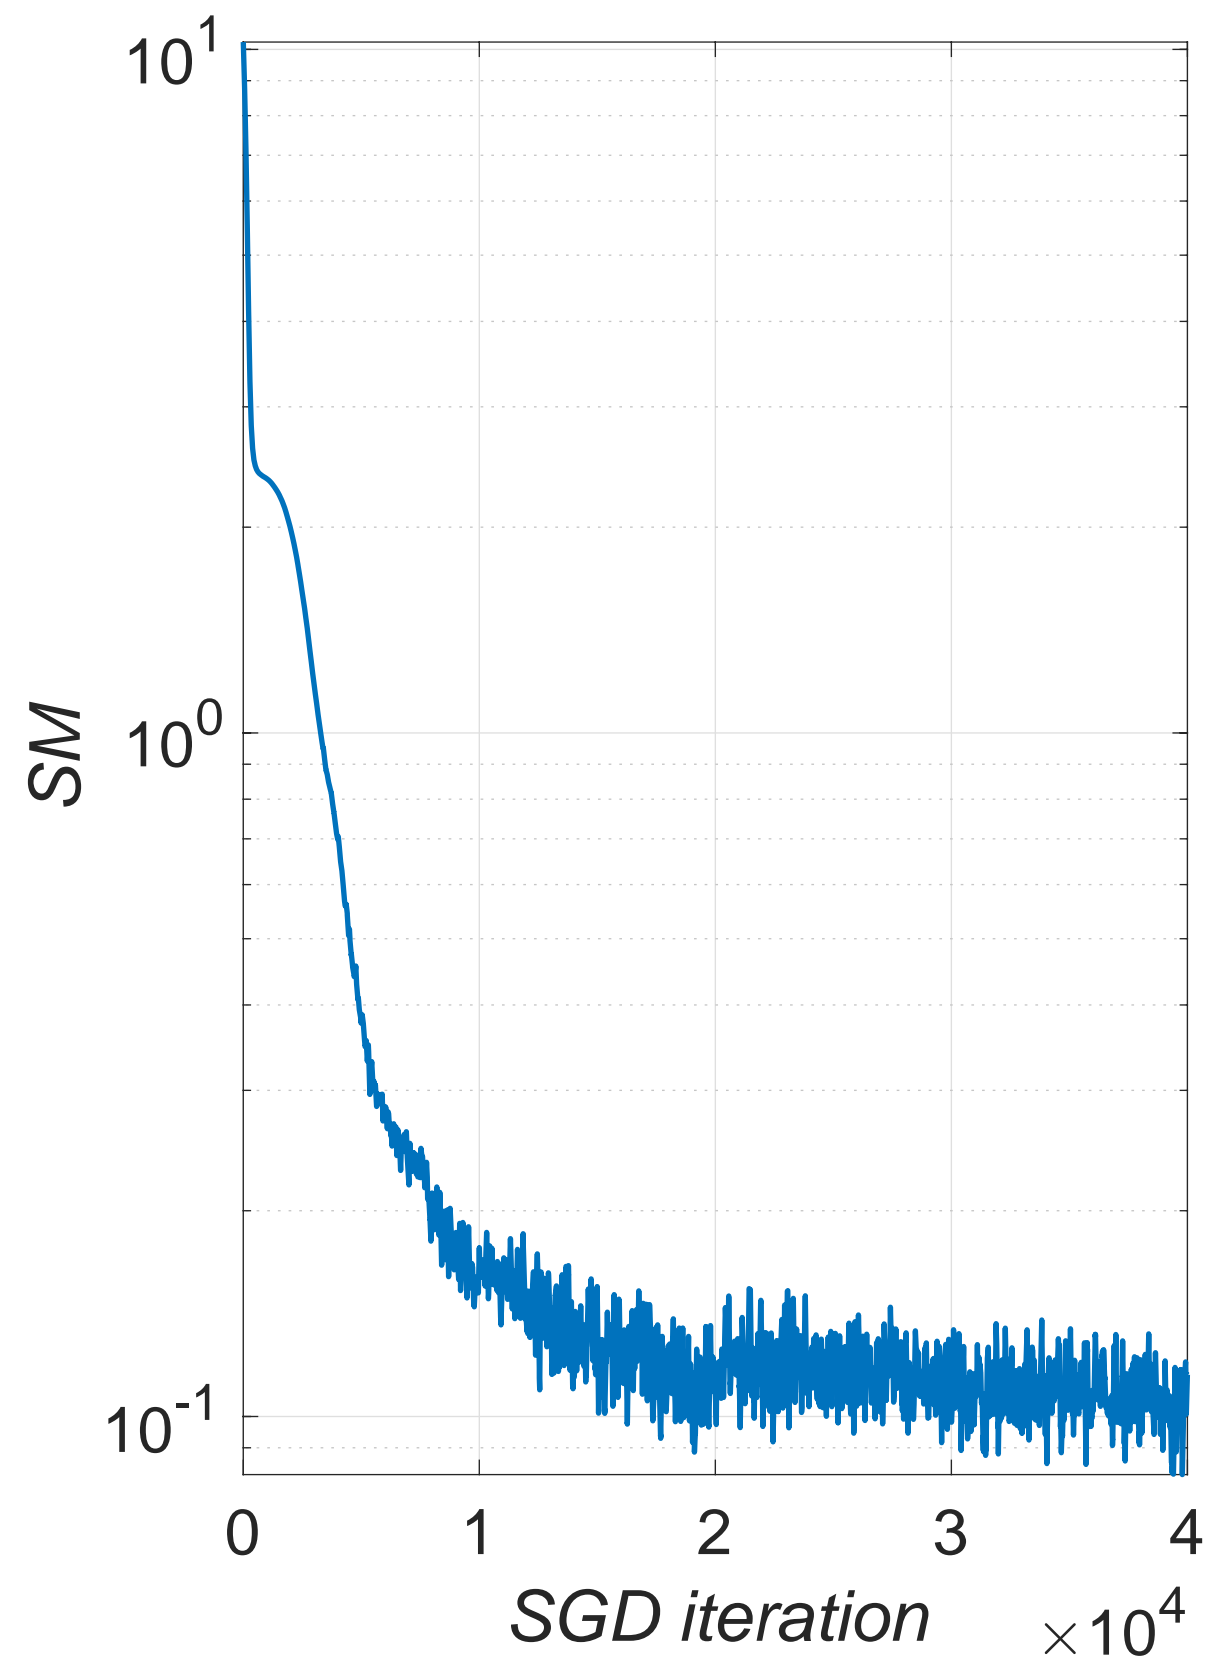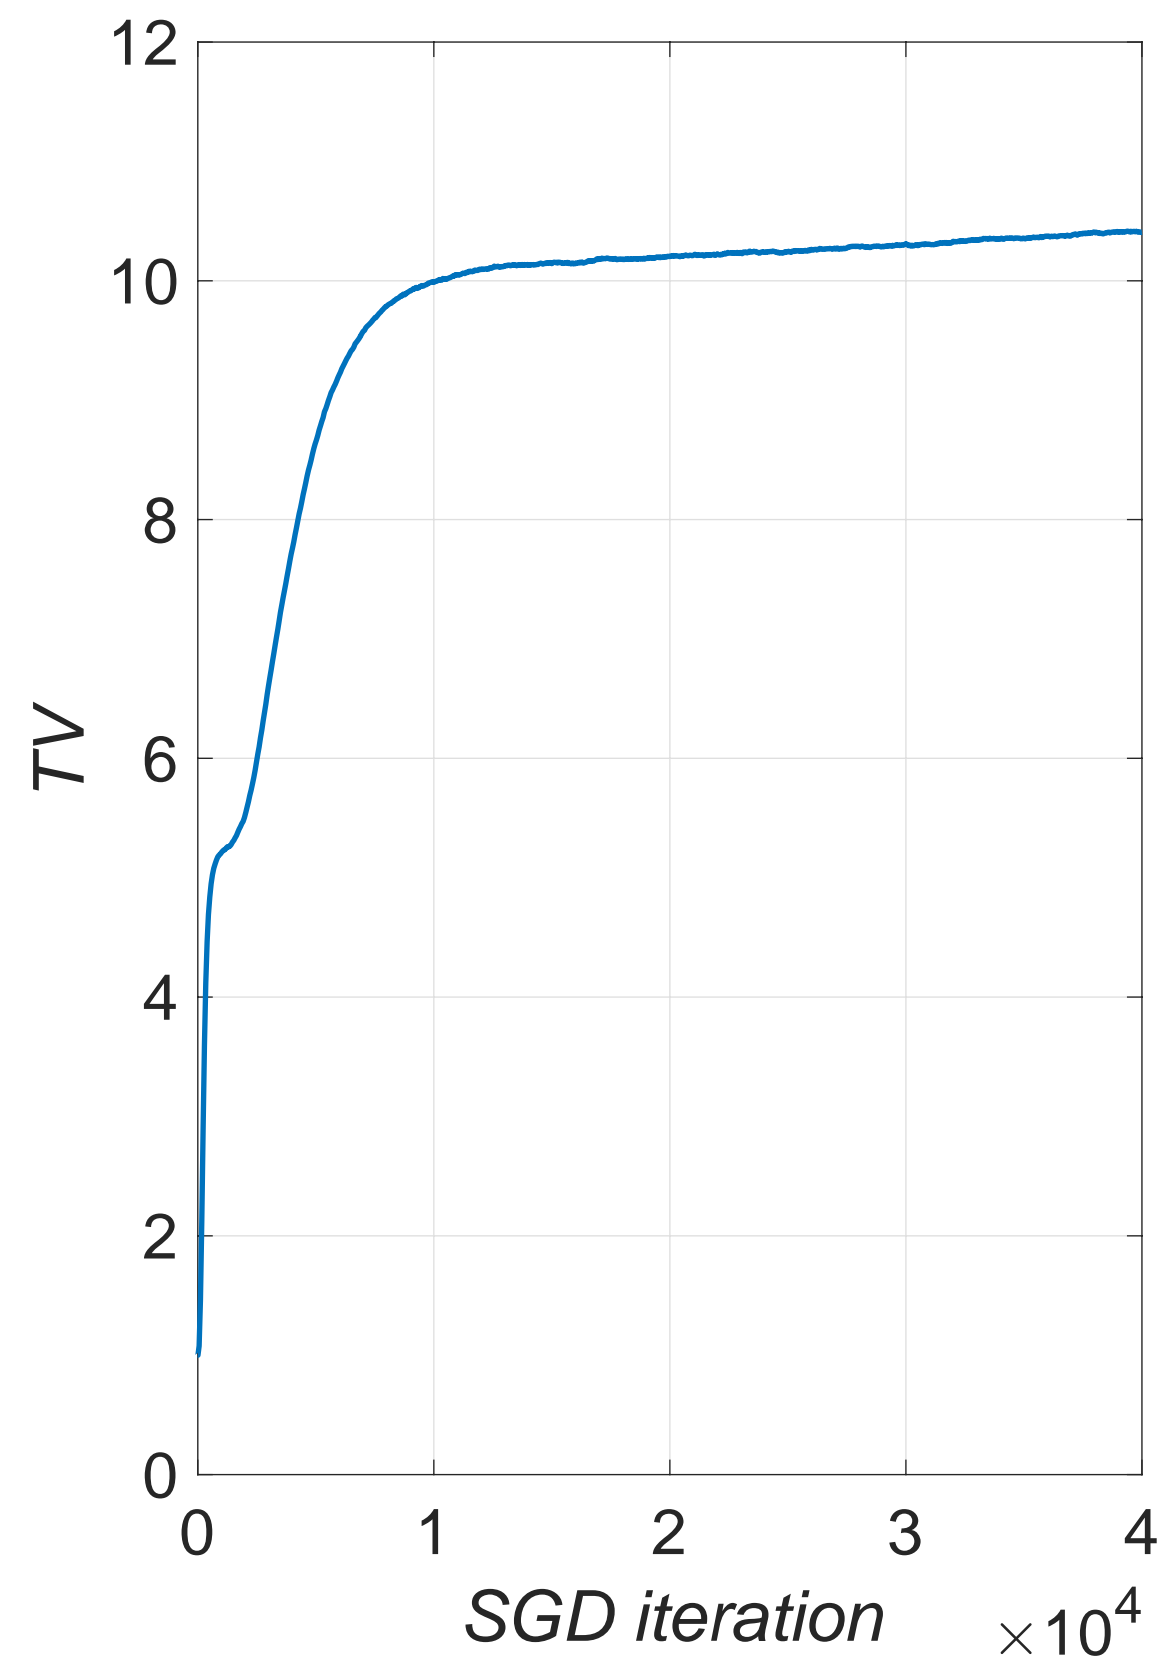

Supplement: supplementary_material [file attachment]

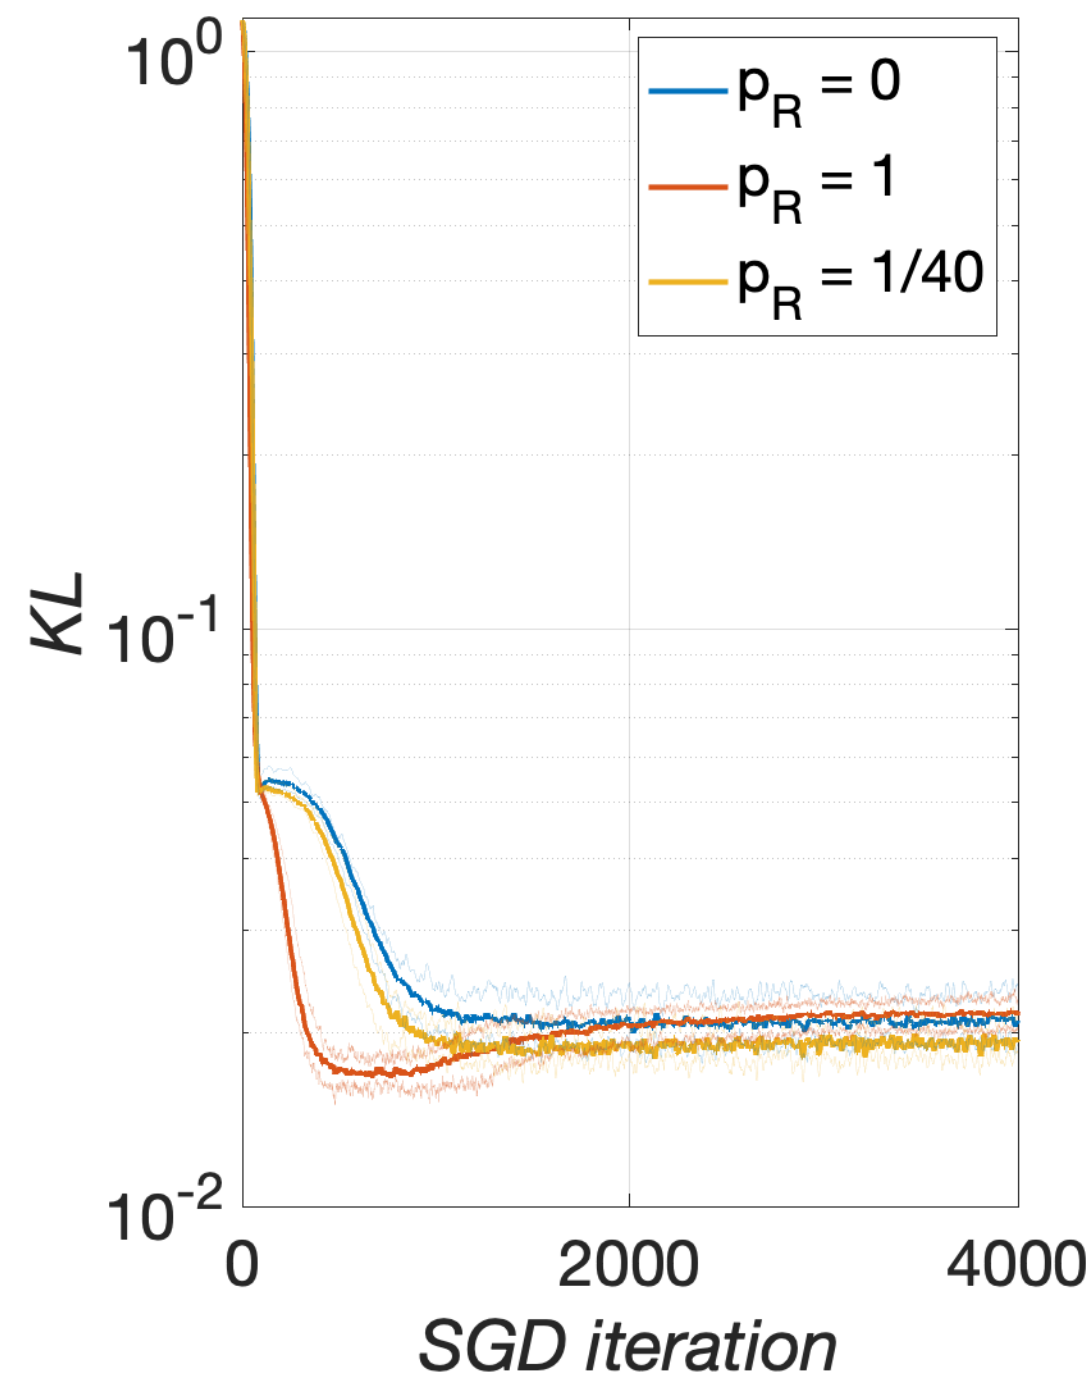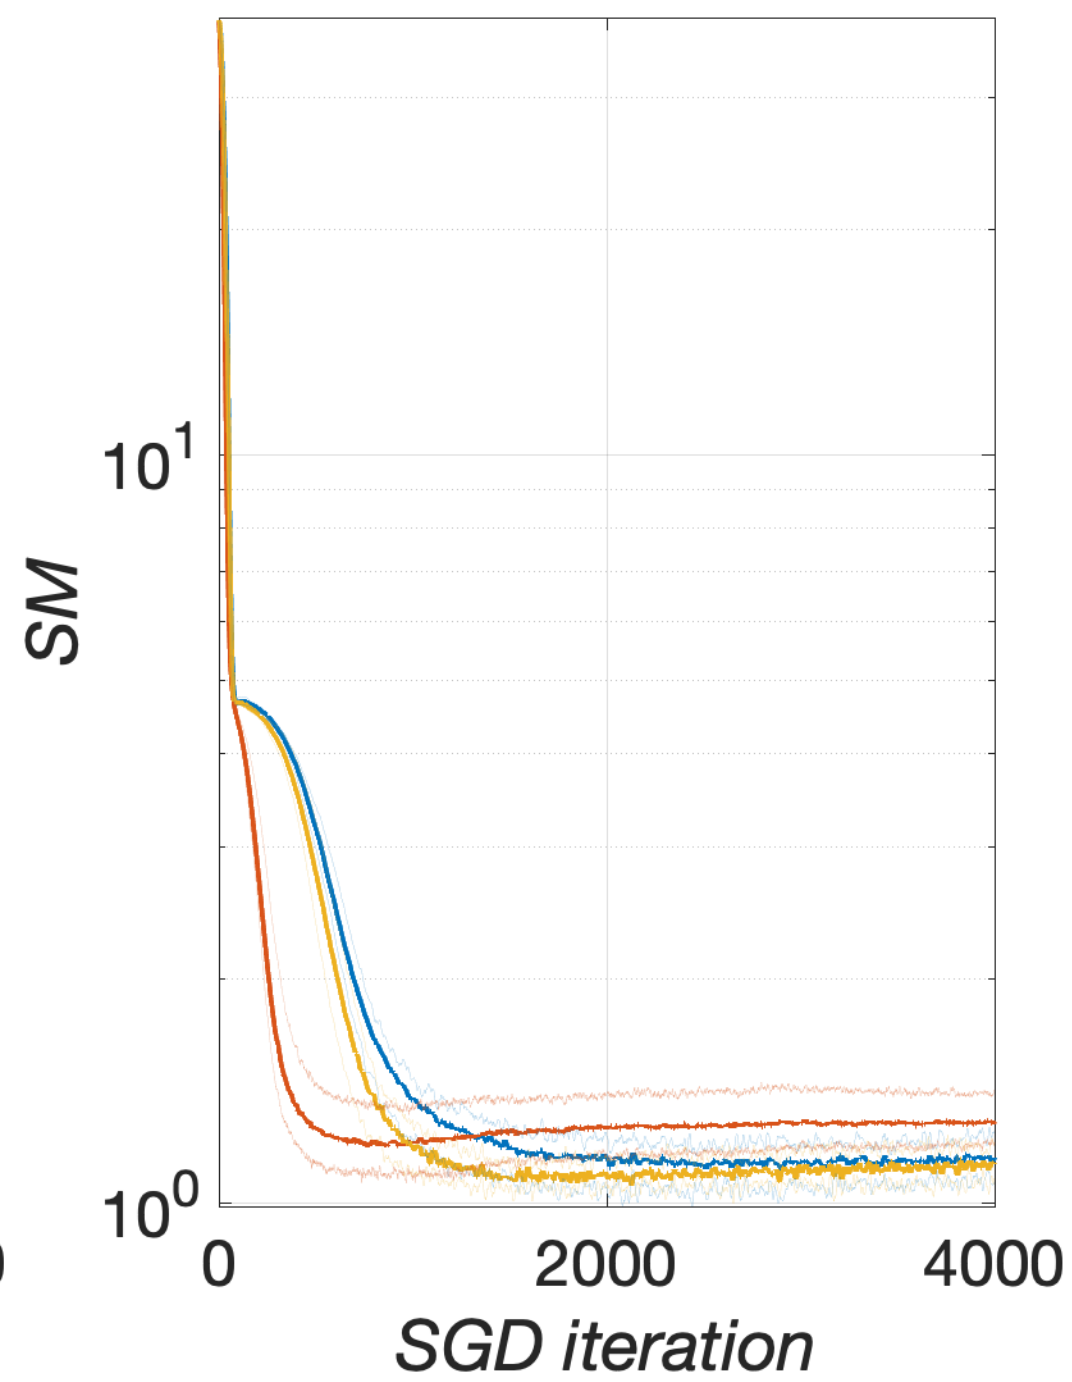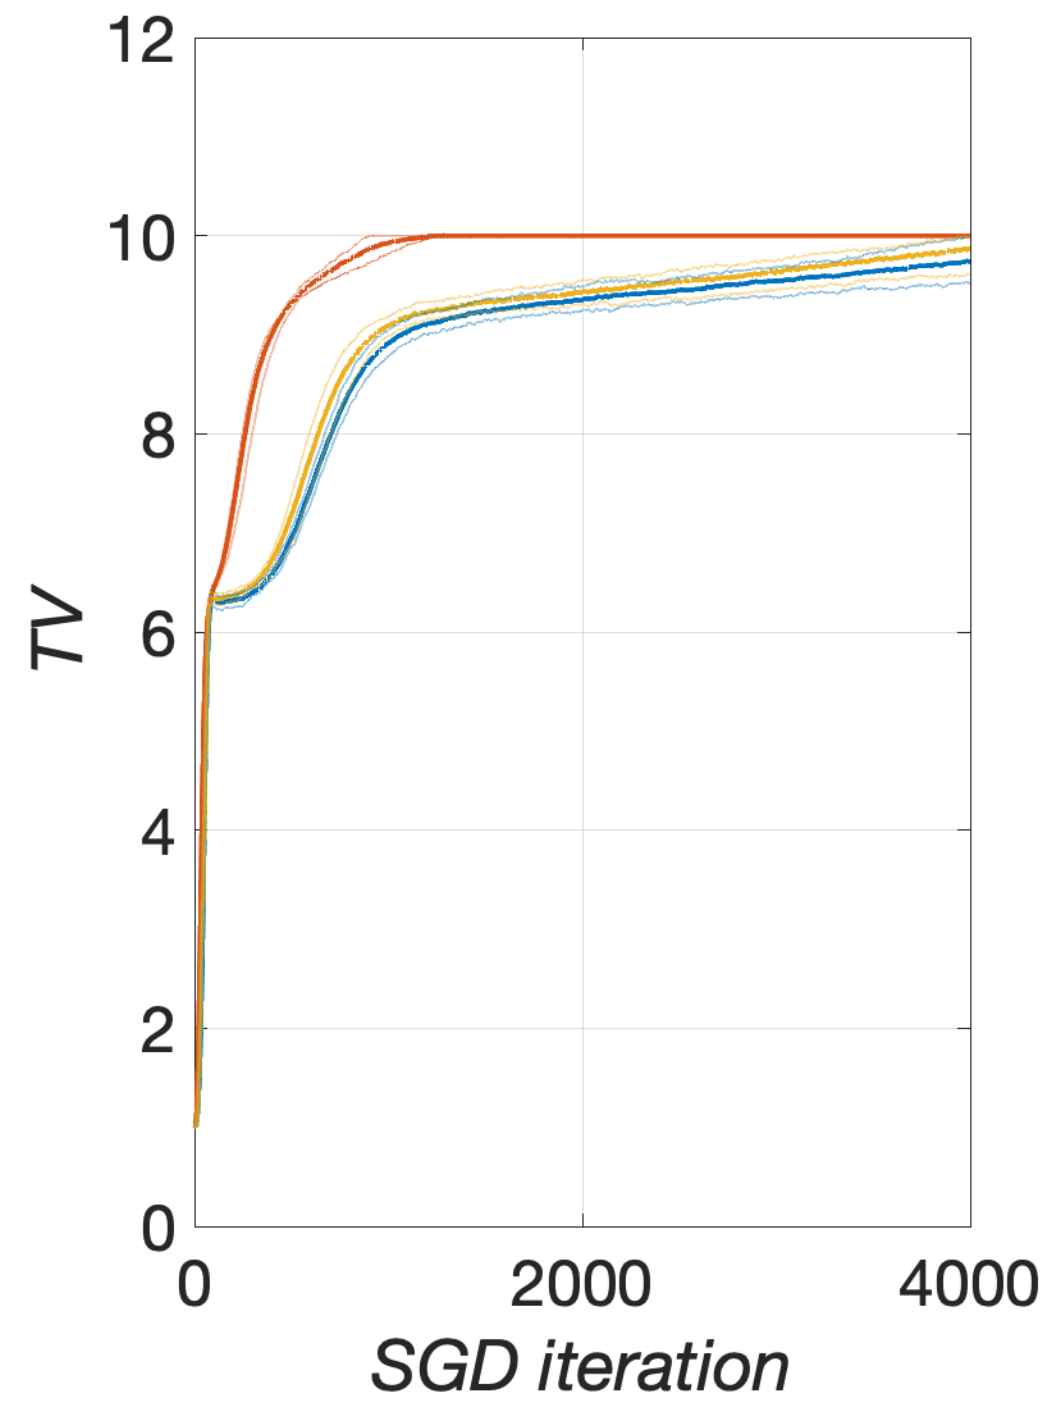

Supplement: supplementary_material [file attachment]

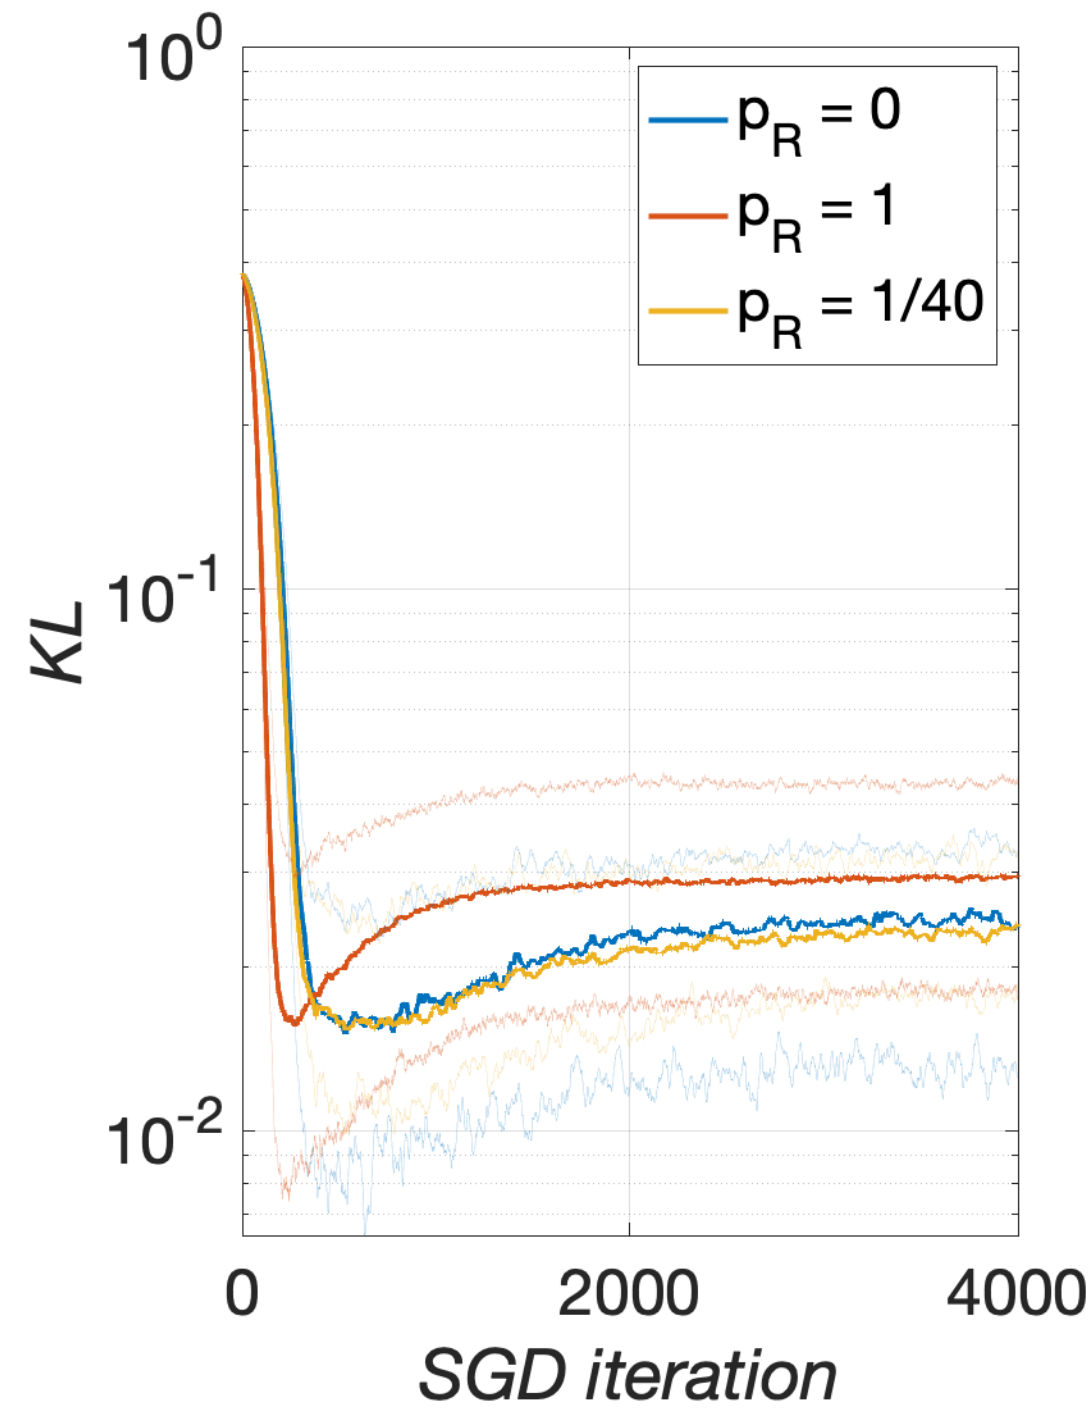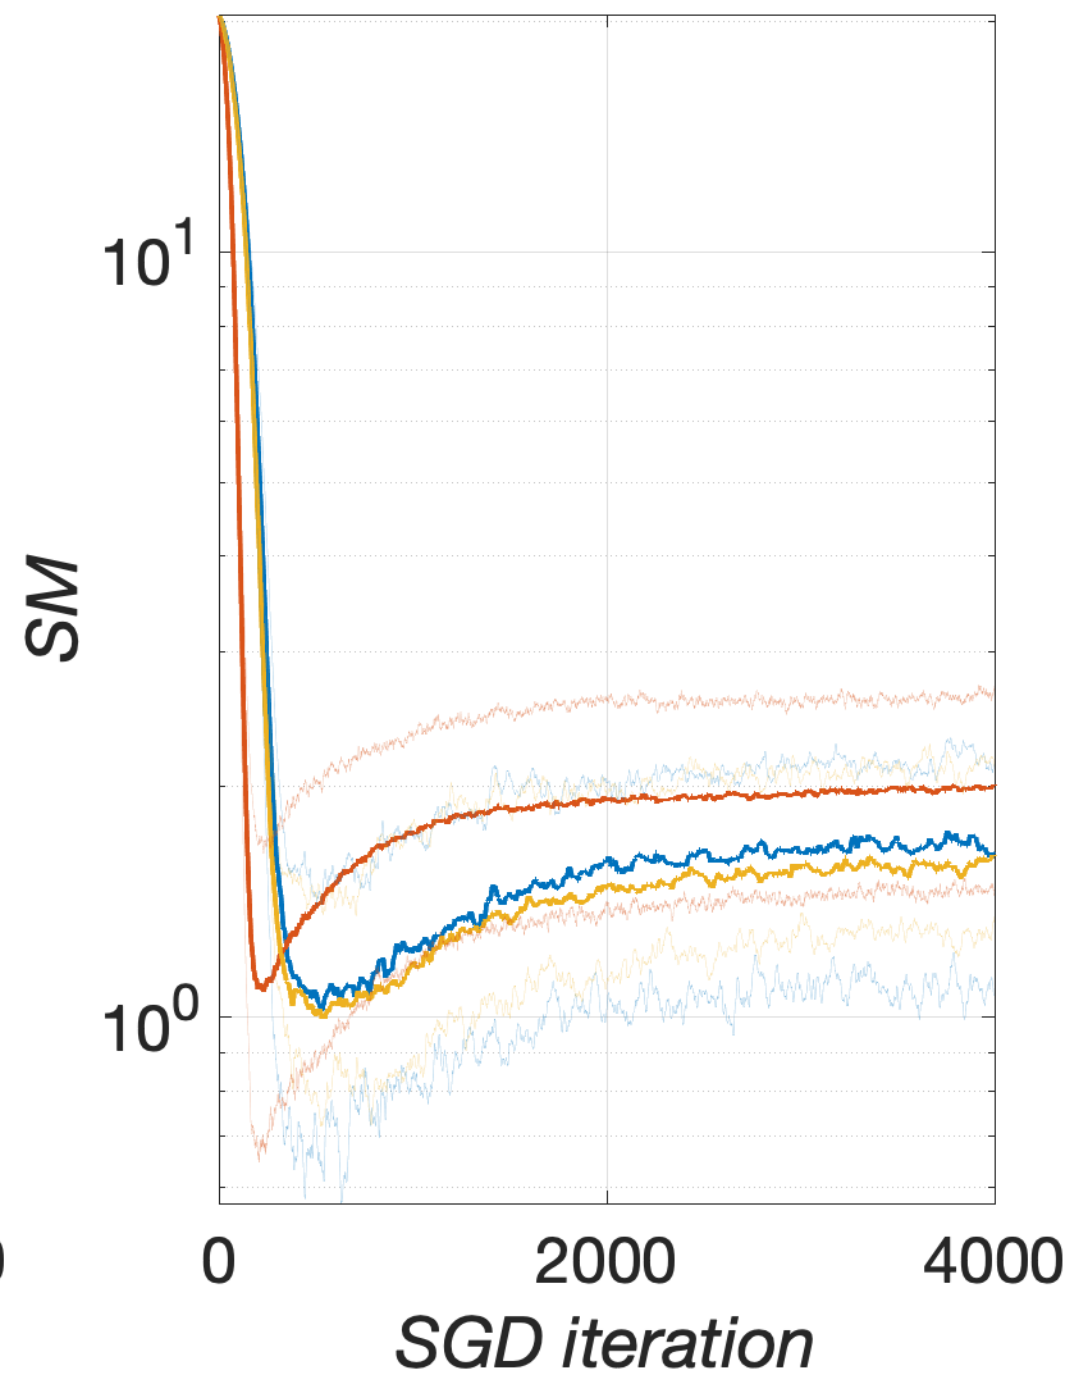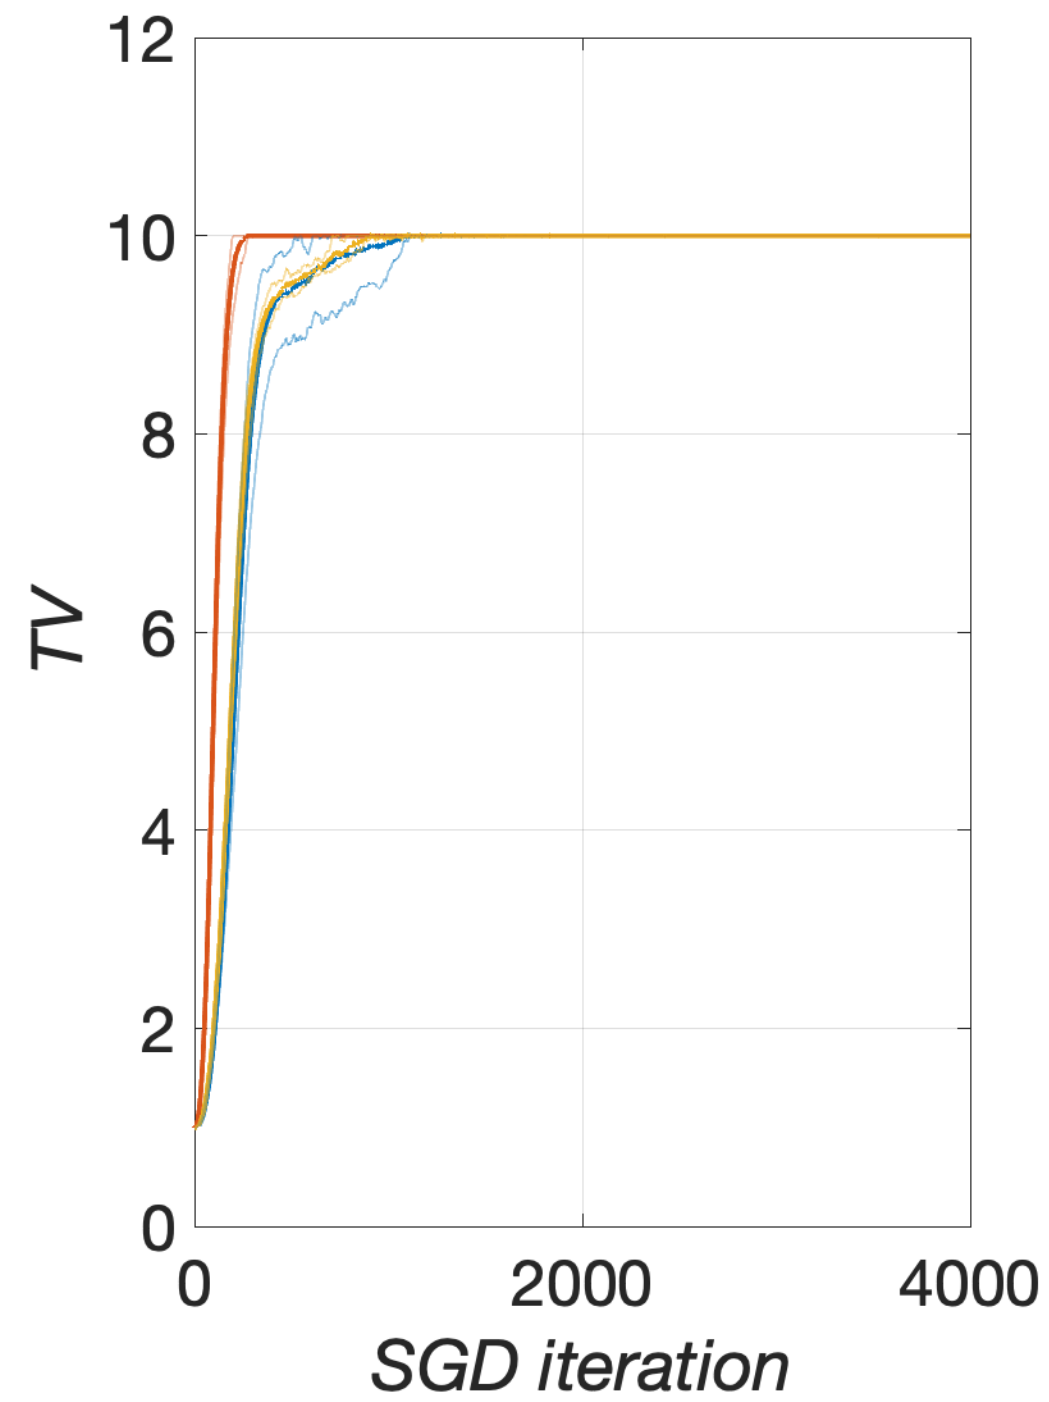

Supplement: supplementary_material [file attachment]
